# Supplementary material for: RiceMetaSysB: a database of blast and bacterial blight responsive genes in rice and its utilization in identifying key blast-resistant WRKY genes
Source: Oxford University Press journal article supplement (doi:10.1093/database/baz015), 2019-01-01
Supplement: suppl_blastblight_baz015_supp.pdf [file suppl_blastblight_baz015_supp.pdf]

Table S1: Datasets used for Rice Blast analysis.

| <b>GEO ID</b> | <b>Genotype</b>                 | <b>Tissue</b> | <b>Stage</b>      | <b>Strain</b> |
|---------------|---------------------------------|---------------|-------------------|---------------|
| GSE7256       | Nipponbare (S)                  | Leaf          | Seedling Stage    | FR13          |
| GSE18361      | Nipponbare (S)                  | Root/leaf     | Seedling Stage    | Guy11         |
| GSE28308      | Non-transgenic Taipei 309 (S)   | Seedling      | Seedling Stage    | PLP-1         |
|               | Transgenic line OX-Pi54 (R)     |               |                   |               |
| GSE30941      | Nipponbare (S)                  | Leaf          | Seedling Stage    | FR13          |
|               |                                 |               |                   | CL367         |
|               |                                 |               |                   | BR29          |
| GSE39635      | Nipponbare [Pia] (R)            | Leaf          | Fourth Leaf Stage | Ina86-137     |
|               | Transgenic line OX-OsWRKY28 (S) |               |                   |               |
| GSE41798      | IRBL18 (Pi9 NIL of LTH) (R)     | Leaf          | Seedling Stage    | CH63          |
|               | IRBL22 (Pi9 NIL of LTH) (R)     |               |                   |               |
|               | LTH (S)                         |               |                   |               |
| GSE62893      | Nipponbare (Pia) (R)            | Leaf          | Fourth Leaf Stage | P91-15B       |
|               | Nipponbare (S)                  |               |                   |               |
| GSE62894      | Nipponbare (Pish) (R)           | Leaf          | Fourth Leaf Stage | Kyu77         |
|               | Nipponbare (S)                  |               |                   |               |
| GSE62895      | Nipponbare (Pia) (R)            | Root          | Fourth Leaf Stage | P91-15B       |
|               | Nipponbare (S)                  |               |                   |               |
| GSE62422      | Nipponbare (Pia) (R)            | Leaf          | Fourth Leaf Stage | P91-15B       |
|               | Nipponbare (S)                  |               |                   |               |

Table S2: Datasets used for Bacterial blight analysis.

| GEO ID   | Genotype       | Tissue       | Stage          | Strain    |
|----------|----------------|--------------|----------------|-----------|
| GSE36272 | Nipponbare (S) | Leaf         | 14 Days        | PXO99A    |
|          |                |              |                | PXO99AME7 |
|          |                |              |                | PXO99AME5 |
|          |                |              |                | T7174     |
|          |                |              |                | PXO86     |
|          |                |              |                | BLS303    |
|          |                |              |                | PXO99AME1 |
|          |                |              |                | PXO99AME2 |
|          |                |              |                | PXO99A-2  |
|          |                |              |                | MOCK      |
| GSE36272 | IR24 (S)       | Leaf         | 14 Days        | PXO99A    |
|          |                |              |                | PXO99AME7 |
|          |                |              |                | PXO99AME5 |
|          |                |              |                | T7174     |
|          |                |              |                | PXO86     |
|          |                |              |                | BLS303    |
|          |                |              |                | PXO99AME1 |
|          |                |              |                | PXO99AME2 |
|          |                |              |                | PXO99A-2  |
|          |                |              |                | MOCK      |
| GSE33411 | IR24 (S)       | Whole plants | 2 Weeks        | PXO86     |
|          | IRBB5 (R)      |              |                |           |
|          | IRBB7 (R)      |              |                |           |
| GSE16793 | Nipponbare (S) | Shoot        | 2 Weeks        | PXO99A    |
| GSE43050 | IR24 (R)       | Leaf         | 35 Days        | PXO71     |
| GSE63337 | Osaba1-1 (R)   | Leaf         | 6.5 Leaf Stage | PXO99     |
|          | Nipponbare (S) |              |                |           |

Table S3: List of primers used for quantitative real time PCR.

| <b>Locus id</b> | <b>WRKY name</b> | <b>Primer sequence</b>  |
|-----------------|------------------|-------------------------|
| LOC_Os01g40260  | OsWRKY77_qF      | GAGGAAGTACGGCAAGAAGAT   |
|                 | OsWRKY77_qR      | CTCCACCCGCTTCTTCAC      |
| LOC_Os01g51690  | OsWRKY26_qF      | GAGGTCGGACGATGAGATACT   |
|                 | OsWRKY26_qR      | CCGGTAGTAGTTCCTCGGATTA  |
| LOC_Os01g53260  | OsWRKY23_qF      | GCAACGTGAAGAAGCAAGTG    |
|                 | OsWRKY23_qR      | AACTGGGAGAGGAACTGGA     |
| LOC_Os03g21710  | OsWRKY79_qF      | GTTTCATGCAGTGGGACGA     |
|                 | OsWRKY79_qR      | GTTTCCGCCGTCGTTCT       |
| LOC_Os05g39720  | OsWRKY70_qF      | TACTCTTACACGAGCCAGCA    |
|                 | OsWRKY70_qR      | GGCTGCTCAAAGAACGACAT    |
| LOC_Os05g45230  | OsWRKY58_qF      | CAGAAGGCCGTCAAGAACA     |
|                 | OsWRKY58_qR      | CAGGTTCTCTGTTGCAGTTTG   |
| LOC_Os05g49620  | OsWRKY19_qF      | AGGTAGTGGCAGAGCCTAT     |
|                 | OsWRKY19_qR      | AGAAGTCGCTGCTGAACTG     |
| LOC_Os06g44010  | OsWRKY28_qF      | TACGAGGGCGAGCACAA       |
|                 | OsWRKY28_qR      | CTGGTGCTGTGAGTGCTTG     |
| LOC_Os09g25070  | OsWRKY62_qF      | GAGGAGGTGGTGCAAGTG      |
|                 | OsWRKY62_qR      | GTGGGATTTGATCCACAACCTA  |
| LOC_Os12g02450  | OsWRKY64_qF      | TCGTCTGAAGCATCACAGATTAG |
|                 | OsWRKY64_qR      | AACAGGTGACGGAGATGTTG    |
| LOC_Os05g46020  | OsWRKY07_qF      | TCCGGACGAAGTCAGAGAT     |
|                 | OsWRKY07_qR      | CGGTAGTAGTTCCTTGGGTTG   |
| LOC_Os09g25060  | OsWRKY76_qF      | GTGCTCCATCTCCATCAACT    |
|                 | OsWRKY76_qR      | CGGCACACCTCCTTGAG       |
| LOC_Os03g50885  | OsActin_qF       | GATCTGGCATCACACCTTCTAC  |
|                 | OsActin_qR       | CTGGGTCATCTTCTCACGATTG  |

Table S4: Structural variations at nucleotide level in Tetep and HP2216 in comparison with Nipponbare.

| Gene name     | Position  | Nipponbare   | HP2216    | Tetep                                                                                                                                                                                                                            |
|---------------|-----------|--------------|-----------|----------------------------------------------------------------------------------------------------------------------------------------------------------------------------------------------------------------------------------|
| <b>WRKY7</b>  | 116       | T            | T         | C                                                                                                                                                                                                                                |
|               | 500       | G            | G         | A                                                                                                                                                                                                                                |
|               | 507       | G            | G         | A                                                                                                                                                                                                                                |
|               | 511-522   | CCGTGTTCAATG | deletion  | CCGTGTTCAATG                                                                                                                                                                                                                     |
|               | 584       | C            | T         | T                                                                                                                                                                                                                                |
|               | 900       | T            | T         | C                                                                                                                                                                                                                                |
|               | 935       | T            | T         | C                                                                                                                                                                                                                                |
|               | 1006-1192 | *            | *         | ATATACTATGGCTGTGTTTCGTCC<br>AGTGACATTGGGTGAGAAAAGGTC<br>CTCGTTTTCCGCGCGCACGTTCC<br>CAAACACTAAACGGTGCGTTTTT<br>TGNNAATAGTTAATACTCAATTA<br>ATCATATGCTAATGGCCACCTCG<br>TTTTGCGTATCTTCCAATCTCCCT<br>ACTCCCCTTCTCCTCAAACACACC<br>CTAT |
|               | 1516      | T            | T         | C                                                                                                                                                                                                                                |
|               | 1895      | C            | C         | T                                                                                                                                                                                                                                |
| <b>WRKY19</b> | 88        | C            | C         | G                                                                                                                                                                                                                                |
|               | 558       | A            | A         | T                                                                                                                                                                                                                                |
|               | 559       | A            | A         | C                                                                                                                                                                                                                                |
|               | 623       | C            | C         | T                                                                                                                                                                                                                                |
|               | 625-632   | CCGCCGCCG    | CCGCCGCCG | deletion                                                                                                                                                                                                                         |
|               | 799       | G            | G         | A                                                                                                                                                                                                                                |
| <b>WRKY23</b> | 514       | C            | C         | A                                                                                                                                                                                                                                |
|               | 524       | G            | G         | A                                                                                                                                                                                                                                |
|               | 731       | G            | G         | A                                                                                                                                                                                                                                |
|               | 947       | T            | T         | C                                                                                                                                                                                                                                |
|               | 1190      | A            | A         | *                                                                                                                                                                                                                                |
|               | 1246      | G            | G         | A                                                                                                                                                                                                                                |
|               | 1326      | *            | *         | A                                                                                                                                                                                                                                |
|               | 1578      | G            | G         | T                                                                                                                                                                                                                                |
|               | 1945-1947 |              |           | AAA INSERTION                                                                                                                                                                                                                    |
|               | 2161-2162 |              |           | GG INSERTION                                                                                                                                                                                                                     |
|               | 2442      | T            | T         | C                                                                                                                                                                                                                                |
|               | 2655      | G            | G         | A                                                                                                                                                                                                                                |
|               | 2762      | *            | *         | C                                                                                                                                                                                                                                |
|               | 2791      | *            | *         | A                                                                                                                                                                                                                                |
|               | 2859-2864 | ACTTGA       | ACTTGA    | deletion                                                                                                                                                                                                                         |
|               | 2999      | T            | T         | C                                                                                                                                                                                                                                |
|               | 3022      | A            | A         | *                                                                                                                                                                                                                                |
|               | 3024      | A            | A         | T                                                                                                                                                                                                                                |
|               | 3074      |              |           | TA INSERTION                                                                                                                                                                                                                     |
|               | 3186-3189 |              |           | TATA INSERTION                                                                                                                                                                                                                   |
| <b>WRKY26</b> | 78        | A            | A         | G                                                                                                                                                                                                                                |

|               |           |                                                   |                                               |                |
|---------------|-----------|---------------------------------------------------|-----------------------------------------------|----------------|
|               | 114-116   | *                                                 | *                                             | ACG INSERTION  |
|               | 188       | G                                                 | G                                             | T              |
|               | 189-230   | GCTCCGGCAGCGGCTACGG<br>CGCCGCCTCGTACGTTGCTC<br>CA | GCTCCGGCAGCGGCTACGGCG<br>CCGCCTCGTACGTTGCTCCA | DELETION       |
|               | 241       | G                                                 | G                                             | C              |
|               | 314-316   |                                                   |                                               | CCA INSERTION  |
|               | 363       | C                                                 | C                                             | G              |
|               | 410-412   |                                                   |                                               | GGC INSERTION  |
|               | 455       | T                                                 | T                                             | A              |
|               | 499       | C                                                 | C                                             | G              |
|               | 516       | T                                                 | T                                             | *              |
|               | 523-525   | ATA                                               | ATA                                           | DELETION       |
| <b>WRKY28</b> | 95        | C                                                 | C                                             | T              |
|               | 205-206   | TC                                                | TC                                            | AA             |
|               | 1043-1056 | ACAACCCGTGCCCG                                    | DELETION                                      | ACAACCCGTGCCCG |
| <b>WRKY58</b> | 257       | A                                                 | A                                             | C              |
|               | 277       | C                                                 | C                                             | A              |
|               | 825       | C                                                 | C                                             | T              |
|               | 837-839   | TCT                                               | TCT                                           | DELETION       |
| <b>WRKY62</b> | 902       | T                                                 | T                                             | A              |
|               | 1117      | C                                                 | C                                             | A              |
|               | 1124      | A                                                 | A                                             | *              |
|               | 1158      | T                                                 | T                                             | C              |
|               | 1175      | A                                                 | A                                             | G              |
|               | 1331      | A                                                 | A                                             | G              |
|               | 1359-1368 | *                                                 | *                                             | GTTGGTTTT      |
|               | 1385      | G                                                 | G                                             | A              |
|               | 1917      | G                                                 | G                                             | A              |
| <b>WRKY64</b> | 99        | G                                                 | C                                             | C              |
|               | 111       | A                                                 | G                                             | G              |
|               | 142       | A                                                 | G                                             | G              |
|               | 154       | C                                                 | T                                             | T              |
|               | 163       | T                                                 | C                                             | C              |
|               | 168       | T                                                 | C                                             | C              |
|               | 169       | C                                                 | T                                             | T              |
|               | 187-190   | TAGC                                              | *                                             | *              |
|               | 222       | A                                                 | G                                             | G              |
|               | 231       | T                                                 | G                                             | G              |
|               | 246-247   | TC                                                | AT                                            | AT             |
|               | 256-258   | *                                                 | CAT                                           | CAT            |
|               | 281       | C                                                 | T                                             | T              |
|               | 289       | T                                                 | T                                             | A              |
|               | 354       | G                                                 | G                                             | A              |
|               | 419       | G                                                 | G                                             | T              |
|               | 430       | C                                                 | C                                             | T              |
|               | 463       | C                                                 | C                                             | G              |

|               |           |       |        |       |
|---------------|-----------|-------|--------|-------|
|               | 469       | A     | A      | G     |
|               | 473       | A     | A      | G     |
|               | 479       | G     | G      | C     |
|               | 484       | A     | A      | G     |
|               | 492       | A     | A      | T     |
|               | 503-507   | GATTC | GATTC  | CCACA |
|               | 509-512   | CCGC  | CCGC   | GATG  |
|               | 521       | G     | G      | C     |
|               | 524-526   | GGC   | GGC    | CAT   |
|               | 530       | C     | C      | G     |
|               | 559-560   | TG    | TG     | CA    |
|               | 570-572   | CTT   | CTT    | *     |
|               | 590       | A     | A      | T     |
|               | 700       | G     | G      | T     |
|               | 749       | G     | G      | A     |
|               | 753       | T     | T      | *     |
|               | 766       | A     | A      | C     |
|               | 785-787   | CAA   | CAA    | *     |
|               | 794       | G     | G      | A     |
|               | 803       | T     | T      | C     |
|               | 878       | C     | C      | A     |
|               | 902       | A     | A      | G     |
|               | 905       | *     | *      | T     |
|               | 924       | T     | T      | C     |
|               | 1005-1010 | *     | ATATAT | *     |
|               | 1043      | T     | C      | C     |
|               | 1079      | T     | A      | T     |
|               | 1112      | C     | C      | A     |
|               | 1115      | T     | C      | T     |
|               | 1139      | T     | C      | T     |
|               | 1143      | G     | A      | G     |
|               | 1157      | G     | T      | G     |
|               | 1175      | C     | T      | C     |
|               | 1195      | C     | C      | T     |
|               | 1201      | C     | T      | C     |
|               | 1488      | G     | G      | T     |
|               | 1498      | C     | T      | C     |
| <b>WRKY70</b> | 57        | T     | T      | G     |
|               | 107       | T     | T      | C     |
|               | 483       | T     | T      | G     |
|               | 509       | T     | T      | C     |
|               | 534       | A     | A      | G     |
|               | 764       | A     | A      | T     |
|               | 1250      | C     | C      | A     |
|               | 1825      | G     | G      | T     |

|               |         |                                                         |          |                                                         |
|---------------|---------|---------------------------------------------------------|----------|---------------------------------------------------------|
|               | 1860    | T                                                       | T        | C                                                       |
|               | 2243    | C                                                       | C        | T                                                       |
|               | 2484    | G                                                       | G        | A                                                       |
|               | 2789    | T                                                       | T        | *                                                       |
| <b>WRKY76</b> | 569     | G                                                       | G        | A                                                       |
|               | 895-944 | CGAGCGCGGACAGCTCGCT<br>GCTGGTGGCGACGTACGAG<br>GGCGAGCAC | deletion | CGAGCGCGGACAGCTCGCTGCTG<br>GTGGCGACGTACGAGGGCGAGCA<br>C |
|               | 901     | C                                                       | C        | T                                                       |
| <b>WRKY77</b> | 824-826 | CAC                                                     | deletion | CAC                                                     |
| <b>WRKY79</b> | 86      | T                                                       | T        | C                                                       |
|               | 492     | A                                                       | A        | T                                                       |
|               | 898     | *                                                       | *        | T                                                       |
|               | 1363    | A                                                       | A        | C                                                       |
|               | 1365    | C                                                       | C        | T                                                       |

Table S5: Variations at amino acid level in HP2216 and Tetep in comparison with Nipponbare

| Gene name     | Position | Nipponbare                | HP2216                    | Tetep          |
|---------------|----------|---------------------------|---------------------------|----------------|
| <b>WRKY7</b>  | 80       | A                         | A                         | T              |
|               | 81-84    | AVFN                      | *                         | AVFN           |
| <b>WRKY19</b> | 85-97    | QVMPPGHGGLISG             |                           | QVMPPGHGGLISG  |
|               | 184      | A                         | A                         | T              |
| <b>WRKY23</b> | 155      | T                         | T                         | K              |
| <b>WRKY26</b> | 15       | N                         | S                         | N              |
|               | 27       | *                         | D                         | *              |
|               | 52-65    | GSGSGYGAASYVAP            | *                         | GSGSGYGAASYVAP |
|               | 66       | T                         | S                         | T              |
|               | 94       | *                         | P                         | *              |
|               | 110      | A                         | G                         | A              |
|               | 126      | *                         | G                         | *              |
|               | 147      | T                         | M                         | T              |
|               | 184      | N                         | N                         | *              |
|               | 186      | Y                         | Y                         | F              |
|               | 187      | R                         | R                         | G              |
|               | 188      | C                         | C                         | T              |
|               | 190-209  | TEGCNVKKRVERDK<br>NDPRYVV | TEGCNVKKRVERDKN<br>DPRYVV | *              |
|               | 210      | T                         | T                         | F              |
|               | 211      | M                         | T                         | V              |
|               | 214      | G                         | G                         | L              |
|               | 215      | I                         | I                         | V              |
|               | 216      | H                         | H                         | F              |
|               | 217      | N                         | N                         | K              |
|               | 218      | H                         | H                         | F              |
|               | 219      | V                         | V                         | G              |
|               | 221      | P                         | P                         | F              |
| <b>WRKY28</b> | 13       | P                         | P                         | S              |
|               | 50       | P                         | P                         | T              |
| <b>WRKY58</b> | 72       | A                         | A                         | E              |
|               | 153      | L                         | L                         | *              |
| <b>WRKY62</b> | 29-31    | *                         | *                         | CVQ            |
| <b>WRKY64</b> | 9        | P                         | S                         | S              |
|               | 33       | R                         | R                         | K              |
|               | 55       | G                         | G                         | C              |
|               | 73       | I                         | I                         | V              |
|               | 75       | E                         | E                         | Q              |
|               | 79       | Q                         | Q                         | L              |
|               | 83       | D                         | D                         | P              |
|               | 84       | S                         | S                         | H              |
|               | 85       | P                         | P                         | D              |



|               |         |   |   |                                             |
|---------------|---------|---|---|---------------------------------------------|
|               | 86      | H | H | D                                           |
|               | 89      | D | D | H                                           |
|               | 90      | G | G | H                                           |
|               | 92      | L | L | V                                           |
|               | 102     | V | V | I                                           |
|               | 106     | S | S | *                                           |
|               | 112     | S | S | C                                           |
|               | 160     | N | N | K                                           |
|               | 192     | H | H | Q                                           |
|               | 220     | A | A | V                                           |
|               | 222     | S | L | S                                           |
|               | 318     | A | A | S                                           |
|               | 321     | A | V | A                                           |
| <b>WRKY70</b> | 90      | I | I | M                                           |
|               | 99      | I | I | T                                           |
|               | 178     | T | T | N                                           |
|               | 370     | A | A | S                                           |
|               | 477     | P | P | L                                           |
| <b>WRKY76</b> | 73      | L | * | M                                           |
|               | 74      | T | * | D                                           |
|               | 75      | E | * | A                                           |
|               | 76      | V | * | A                                           |
|               | 77      | I | * | W                                           |
|               | 78      | A | * | R                                           |
|               | 79      | R | * | G                                           |
|               | 80      | L | * | G                                           |
|               | 81      | Y | * | V                                           |
|               | 82      | G | * | G                                           |
|               | 83      | G | * | C                                           |
|               | 84      | Q | * | S                                           |
|               | 85      | I | * | P                                           |
|               | 86      | P | * | V                                           |
|               | 87      | R | * | C                                           |
|               | 88      | L | * | L                                           |
|               | 89      | G | * | D                                           |
|               | 90      | L | * | L                                           |
|               | 91      | D | * | C                                           |
|               | 92      | G | * | V                                           |
|               | 93      | S | * | G                                           |
|               | 94      | A | A | L                                           |
|               | 97      | P | P | V                                           |
|               | 99      | P | P | E                                           |
|               | 100-134 | * | * | PSAARHELLDRPAGCR<br>GGGDSKSMTNDEAKIL<br>EAK |

|               |         |                                                                                                                 |   |                                                                                                                  |
|---------------|---------|-----------------------------------------------------------------------------------------------------------------|---|------------------------------------------------------------------------------------------------------------------|
|               | 136     | S                                                                                                               | S | T                                                                                                                |
|               | 137     | P                                                                                                               | P | Q                                                                                                                |
|               | 138     | L                                                                                                               | L | M                                                                                                                |
|               | 140     | G                                                                                                               | G | E                                                                                                                |
|               | 141     | K                                                                                                               | K | E                                                                                                                |
|               | 142-147 | *                                                                                                               | * | NRRLTE                                                                                                           |
|               | 220-311 | TRDNPSPRAYFRCAF<br>APSCPVKKKVQRSAE<br>DSSLLVATYEGEH<br>PHPSPRAGELPAAAG<br>GAGGSLPCISISINSSGP<br>TITLTLTKNGGAVQV | * | TRDNPSPRAYFRCAFAP<br>SCPVKKKVQRSAEDSS<br>LLVATYEGEHHPHPS<br>PRAGELPAAAGGAGGS<br>LPCISISINSSGPTITLTLT<br>KNGGAVQV |
| <b>WRKY77</b> | 93      | H                                                                                                               | H | *                                                                                                                |
| <b>WRKY79</b> | 29      | V                                                                                                               | V | A                                                                                                                |
|               | 216     | N                                                                                                               | N | H                                                                                                                |

Table S6: Selected known Transcription factor (TF) binding elements in the promoters of DEG WRKYs.

| Sl. No. | Pro ID | Nipponbare         |           | HP2216             |           | Tetep             |           |
|---------|--------|--------------------|-----------|--------------------|-----------|-------------------|-----------|
|         |        | Binding sequence   | TF family | Binding sequence   | TF family | Binding sequence  | TF family |
|         | pW07   | acGTCGGtgt         | AP2       | acGTCGGtgt         | AP2       | acGTCGGtgt        | AP2       |
|         |        | acgccCACGTcggtgctc | bHLH      | acgccCACGTcggtgctc | bHLH      |                   |           |
|         |        | cCCACGtcg          | bZIP      | cCCACGtcg          | bZIP      | cCCACGtcg         | bZIP      |
|         |        | cTTGACta           | WRKY      | cTTGACta           | WRKY      | tGTCAA            | WRKY      |
|         |        | ccAACCAact         | MYB       | ccAACCAact         | MYB       | ccAACCAact        | MYB       |
|         |        | aaaafTTTCT         | HSF       | aaaafTTTCT         | HSF       |                   |           |
|         |        | CTCGG              | Dehydrin  | CTCGG              | Dehydrin  | CTCGG             | Dehydrin  |
|         |        | agCGGCT            | ERF       | agCGGCT            | ERF       | agCGGCT           | ERF       |
|         | pW19   | aACGTGc            | bHLH      | aACGTGc            | bHLH      |                   |           |
|         |        | aaaACGTGct         | bZIP      | aaaACGTGct         | bZIP      | aaaACGTGct        | bZIP      |
|         |        | cgGTCAAagt         | WRKY      | cgGTCAAagt         | WRKY      | cgGTCAAagt        | WRKY      |
|         |        | tggTAGGTtg         | MYB       | tggTAGGTtg         | MYB       | tggTAGGTtg        | MYB       |
|         |        | caaCCTTAg          | AP2       | caaCCTTAg          | AP2       | caaCCTTAg         | AP2       |
|         |        | AGAAAgtttt         | HSF       | AGAAAgtttt         | HSF       | AGAAAgtttt        | HSF       |
|         |        | CCGAG              | Dehydrin  | CCGAG              | Dehydrin  |                   |           |
|         | pW23   | tcCGGCCgcc         | AP2       | tcCGGCCgcc         | AP2       | tcCGGCCgcc        | AP2       |
|         |        | gtggcgCACGTccggccg | bHLH      | gtggcgCACGTccggccg | bHLH      |                   |           |
|         |        | taaCGTGGc          | bZIP      | taaCGTGGc          | bZIP      |                   |           |
|         |        | ttTTGACttc         | WRKY      | ttTTGACttc         | WRKY      | ttTTGACttc        | WRKY      |
|         |        | aaACCTAtct         | MYB       | aaACCTAtct         | MYB       | gggTGGTTgt        | MYB       |
|         |        | TCGAC              | Dehydrin  | TCGAC              | Dehydrin  | AGAACTtttt        | HSF       |
|         | pW26   | ccaCCGACgt         | AP2       | ccaCCGACgt         | AP2       | ccaCCGACgt        | AP2       |
|         |        | cGAAGCttca         | HSF       | cGAAGCttca         | HSF       | cGAAGCttca        | HSF       |
|         |        | gCACGTg            | bHLH      | gCACGTg            | bHLH      | gCACGTg           | bHLH      |
|         |        | acatgCACGTgta      | bZIP      | acatgCACGTgta      | bZIP      | acatgCACGTgta     | bZIP      |
|         |        | actTTGACca         | WRKY      | actTTGACca         | WRKY      | CCAAC             | Dehydrin  |
|         |        | GTAGG              | Dehydrin  | GTGGG              | Dehydrin  | TGACC             | WRKY      |
|         |        | ggCGGCT            | ERF       | ggCGGCT            | ERF       | AGCCGca           | ERF       |
|         | pW28   | GCATGtgg           | bHLH      | GCATGtgg           | bHLH      | GCATGtgg          | bHLH      |
|         |        | tacCAGCTgg         | bZIP      | tacCAGCTgg         | bZIP      | tacCAGCTgg        | bZIP      |
|         |        | gaGTCAAcaa         | WRKY      | gaGTCAAcaa         | WRKY      | gaGTCAAcaa        | WRKY      |
|         |        | gcAACCAgcc         | MYB       | gcAACCAgcc         | MYB       | gcAACCAgcc        | MYB       |
|         |        | AGAACTtttt         | HSF       | AGAACTtttt         | HSF       | AGAACTtttt        | HSF       |
|         |        | GTCGT              | Dehydrin  | GTCGT              | Dehydrin  | GTCGT             | Dehydrin  |
|         | pW58   | ccgACGTCac         | bZIP      | ccgACGTCac         | bZIP      | ccgACGTCac        | bZIP      |
|         |        | gcaCCGACac         | AP2       | gcaCCGACac         | AP2       | gcaCCGACac        | AP2       |
|         |        | ctgcccCACGTgttctg  | bHLH      | ctgcccCACGTgttctg  | bHLH      | ctgcccCACGTgttctg | bHLH      |
|         |        | ccgTTGACga         | WRKY      | ccgTTGACga         | WRKY      | ccgTTGACga        | WRKY      |
|         |        | gcAACCAacta        | MYB       | gcAACCAacta        | MYB       | gcAACCAacta       | MYB       |
|         |        | CCGAG              | Dehydrin  | CCGAG              | Dehydrin  | CCGAG             | Dehydrin  |

| Sl. No. | Pro ID | Nipponbare         |           | HP2216             |           | Tetep              |           |
|---------|--------|--------------------|-----------|--------------------|-----------|--------------------|-----------|
|         |        | Binding sequence   | TF family | Binding sequence   | TF family | Binding sequence   | TF family |
|         | pW62   | ctcgggCACGTAagcacg | bHLH      | ctcgggCACGTAagcacg | bHLH      | ctcgggCACGTAagcacg | bHLH      |
|         |        | ttCACGTttt         | bZIP      | ttCACGTttt         | bZIP      | ttCACGTttt         | bZIP      |
|         |        | cgGTCAAag          | WRKY      | cgGTCAAag          | WRKY      | cgGTCAAag          | WRKY      |
|         |        | gaAACCAacg         | MYB       | gaAACCAacg         | MYB       | gaAACCAacg         | MYB       |
|         |        | ccTACGAagc         | AP2       | ccTACGAagc         | AP2       | ccTACGAagc         | AP2       |
|         |        | CCAAC              | Dehydrin  | CCAAC              | Dehydrin  | CCAAC              | Dehydrin  |
|         |        | AGCCGcg            | ERF       | AGCCGcg            | ERF       | AGCCGcg            | ERF       |
|         |        | ACGGCgcc           | NAC       | ACGGCgcc           | NAC       | ACGGCgcc           | NAC       |
|         | pW64   | GAACGtac           | bHLH      | GAACGtac           | bHLH      |                    |           |
|         |        | atgCGTCAca         | bZIP      | atgCGTCAca         | bZIP      |                    |           |
|         |        | tagTGGTTgc         | MYB       | tagTGGTTgc         | MYB       | tagTGGTTgc         | MYB       |
|         |        | tgaagGTTCT         | HSF       | tgaagGTTCT         | HSF       | tgaagGTTCT         | HSF       |
|         |        | ATCGG              | Dehydrin  | CCTAC              | Dehydrin  |                    |           |
|         | pW70   | tccACGTCac         | bZIP      | tccACGTCac         | bZIP      | tccACGTCac         | bZIP      |
|         |        | cCACGTc            | bHLH      | cCACGTc            | bHLH      | cCACGTc            | bHLH      |
|         |        | gctTTGACca         | WRKY      | gctTTGACca         | WRKY      | gctTTGACca         | WRKY      |
|         |        | ccAACCAatct        | MYB       | ccAACCAatct        | MYB       | ccAACCAatct        | MYB       |
|         |        | agtatATTCT         | HSF       | agtatATTCT         | HSF       | aaaCCTTAat         | AP2       |
|         |        | CTGAC              | Dehydrin  | CTGAC              | Dehydrin  | agtatATTCT         | HSF       |
|         |        |                    |           |                    |           | CTGAC              | Dehydrin  |
|         | pW76   | gTGACGtaag         | bZIP      | gTGACGtaag         | bZIP      |                    |           |
|         |        | attcgtgACGTGcgctcc | bHLH      | attcgtgACGTGcgctcc | bHLH      | attcgtgACGTGcgctcc | bHLH      |
|         |        | cTTGACcg           | WRKY      | cTTGACcg           | WRKY      | cTTGACcg           | WRKY      |
|         |        | tcACCTAgcc         | MYB       | tcACCTAgcc         | MYB       | tcACCTAgcc         | MYB       |
|         |        | AGAATattat         | HSF       | AGAATattat         | HSF       | AGAACatgct         | HSF       |
|         |        | CACGCgtgccgaac     | AP2       | CACGCgtgccgaac     | AP2       | CACGCgtgccgaac     | AP2       |
|         |        | CCGAA              | Dehydrin  | CCGAA              | Dehydrin  | CCGAA              | Dehydrin  |
|         | pW77   | gtGACGTact         | bZIP      | gtGACGTact         | bZIP      |                    |           |
|         |        | GCGCGcgc           | bHLH      | GCGCGcgc           | bHLH      | GCGCGcgc           | bHLH      |
|         |        | tCCGTTgagt         | MYB       | tCCGTTgagt         | MYB       | tCCGTTgagt         | MYB       |
|         |        | CCGTC              | Dehydrin  | CCGTC              | Dehydrin  |                    |           |
|         |        | TGACT              | WRKY      | TGACT              | WRKY      |                    |           |
|         | pW79   | gtgtgaCACGTcgtcccg | bHLH      | gtgtgaCACGTcgtcccg | bHLH      |                    |           |
|         |        | ctaCGTGGa          | bZIP      | ctaCGTGGa          | bZIP      | ctaCGTGGa          | bZIP      |
|         |        | cgGTCAAagg         | WRKY      | cgGTCAAagg         | WRKY      |                    |           |
|         |        | gCCGTTcggt         | MYB       | gCCGTTcggt         | MYB       | gCCGTTcggt         | MYB       |
|         |        | cgaaaTTTCT         | HSF       | cgaaaTTTCT         | HSF       | cgaaaTTTCT         | HSF       |
|         |        | GTCTG              | Dehydrin  | GTCTG              | Dehydrin  |                    |           |

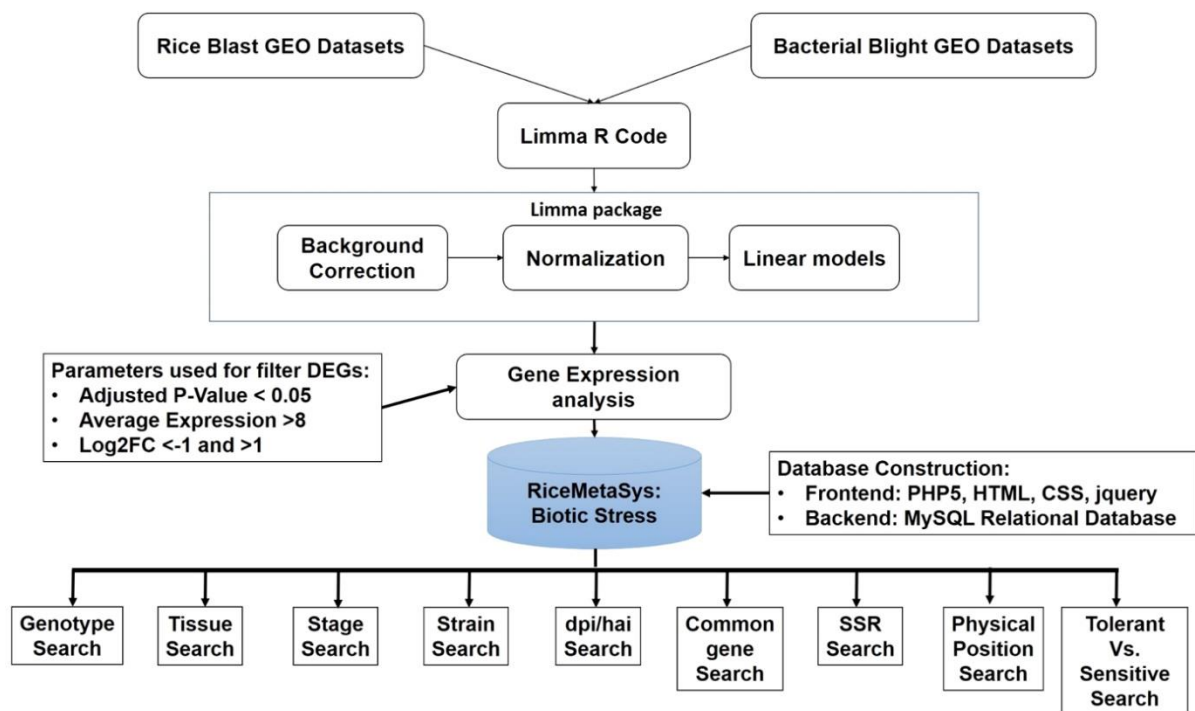

Fig. S1: Metadata Analysis and Database Design: Schematic Diagram of RiceMetaSys (Biotic Stress) Database. Expression datasets were downloaded from the NCBI Gene expression Omnibus (GEO) Database. The datasets were analyzed by using limma package in R platform. Different kinds of search options were enabled for users to retrieve responsive genes from the Database.

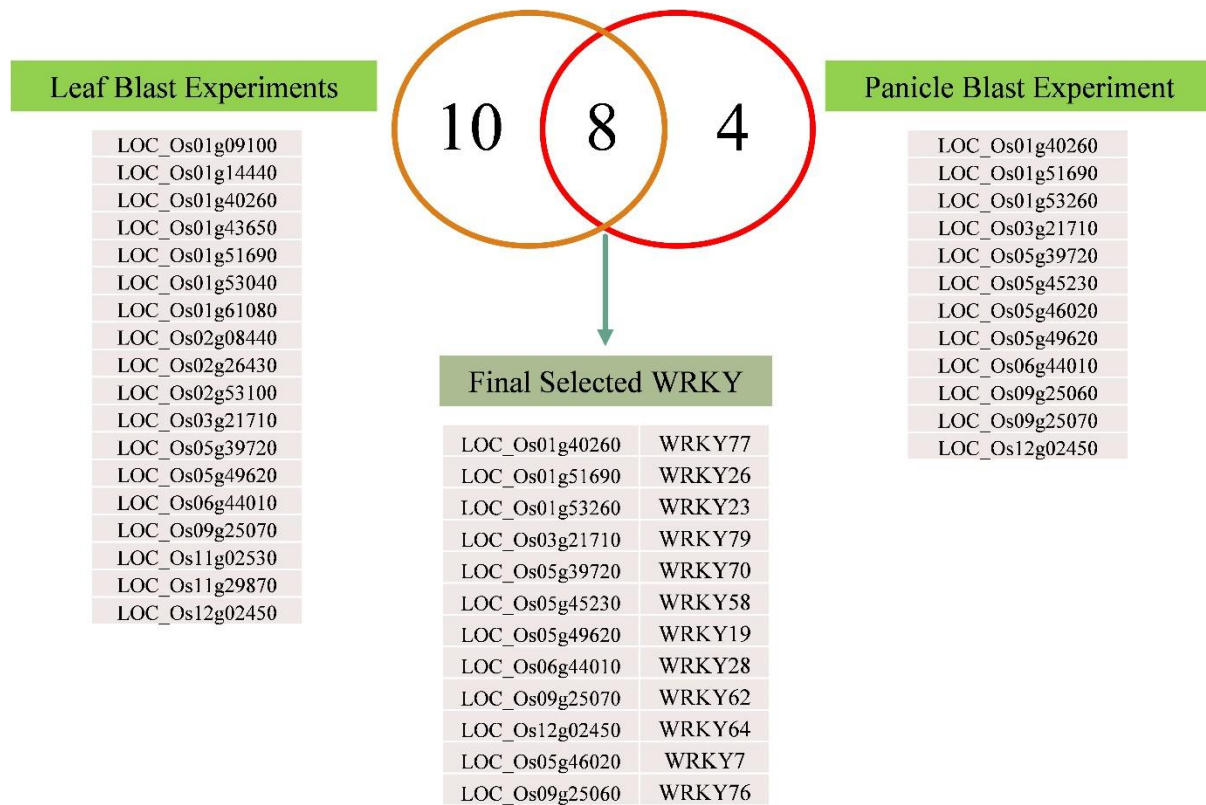

Fig. S2: Differentially expressed WRKY genes selected from RiceMetaSysB database and from panicle blast transcriptome.





```

150      160      170      180      190      200      210
LOC_Os12g02450_WRKY64  -----MKNSSNKRPLVADQWHPSS 19
HWRKY64                -----MKNSSNKRSLVADQWHPSS 19
T_WRKY64                -----MKNSSNKRSLVADQWHPSS 19
LOC_Os03g21710_WRKY79  -----MAFSSEGGVPAE 12
H_WRKY79                -----MAFSSEGGVPAE 12
T_WRKY79                -----MAFSSEGGVPAE 12
LOC_Os05g49620_WRKY19  -----MVELCGGEGEGQI 13
H_WRKY19                -----MVELCGGEGEGQI 13
T_WRKY19                -----MVELCGGEGEGQI 13
LOC_Os05g46020_WRKY07  -----MAAVGAHAHV 10
T_WRKY07                -----MAAVGAHAHV 10
H_WRKY07                -----MAAVGAHAHV 10
LOC_Os01g51690_WRKY26  -----MYMAAAAAGASTP 13
H_WRKY26                -----MYMAAAAAGASTP 13
T_WRKY26                -----MYMAAAAAGASTP 13
H_WEKY77                -----MSSLYPSLL 9
T_WRKY77                -----MSSLYPSLL 9
LOC_Os01g40260_WRKY77  -----MSSLYPSLL 9
LOC_Os05g39720_WRKY70  SNSFMQDSMLMAPLGGDPYNGEQQQPWSYQEPMTDADTRPAEFTSSAAAGDVAGNGSYQVAAPAAAGGF 210
H_WRKY70                SNSFMQDSMLMAPLGGDPYNGEQQQPWSYQEPMTDADTRPAEFTSSAAAGDVAGNGSYQVAAPAAAGGF 210
T_WRKY70                SNSFMQDSMLMAPLGGDPYNGEQQQPWSYQEPMTDADTRPAEFTSSAAAGDVAGNGSYQVAAPAAAGGF 210
LOC_Os01g53260_WRKY23  -----MENLQLQGDD--HDDEALPHFFPYFAVPSPP 28
H_WRKY23                -----MENLQLQGDD--HDDEALPHFFPYFAVPSPP 28
T_WRKY23                -----MENLQLQGDD--HDDEALPHFFPYFAVPSPP 28
T_WRKY58                -----MDGLEAAAGDQQHGRLLIPLQPAAYLASSS 30
H_WRKY58                -----MDGLEAAAGDQQHGRLLIPLQPAAYLASSS 30
LOC_Os05g45230_WRKY58  -----MDGLEAAAGDQQHGRLLIPLQPAAYLASSS 30
LOC_Os06g44010_WRKY28  RLSFSSPSSPPFPVLDQYIQFMDSWIEQTSLSLDLNVGLPSTARRSSAPAAPIKVLVEENFLSFKKDE 107
H_WRKY28                RLSFSSPSSPPFPVLDQYIQFMDSWIEQTSLSLDLNVGLPSTARRSSAPAAPIKVLVEENFLSFKKDE 107
T_WRKY28                RLSFSSPSSPPFPVLDQYIQFMDSWIEQTSLSLDLNVGLPSTARRSSAPAAPIKVLVEENFLSFKKDE 107
H_WRKY62                -----MDDGDGSSSPVDDSAAGLLPLFRSFCVQ 31
T_WRKY62                -----MDDGDGSSSPVDDSAAGLLPLFRSFCVQ 31
LOC_Os09g25070_WRKY62  -----MDDGDGSSSPVDDSAAGLLPLFRSFCVQ 28
LOC_Os09g25060_WRKY76  -----MDAANRGGVGCSPVCLDLCVGLSPVREPSAARH 33
H_WRKY76                -----MDAANRGGVGCSPVCLDLCVGLSPVREPSAARH 33
T_WRKY76                -----MDAANRGGVGCSPVCLDLCVGLSPVREPSAARH 33

```

```

220      230      240      250      260      270      280
LOC_Os12g02450_WRKY64  VCCDHRAALREIARQSLVTQLRAIVLPALHSDEKRDGLAAQ-----MLEGILDCSRKAISE 75
HWRKY64                VCCDHRAALREIARQSLVTQLRAIVLPALHSDEKRDGLAAQ-----MLEGILDCSRKAISE 75
T_WRKY64                VCCDHRAALREIARQSLVTQLRAIVLPALHSDEKRDGLAAQ-----MLEGILDCSRKAISE 75
LOC_Os03g21710_WRKY79  RVAAAVNDLVEVRDGL--LVRLRGFLPPPPQAEQSSSRPFC-----AAELMDATMSKILMSA 65
H_WRKY79                RVAAAVNDLVEVRDGL--LVRLRGFLPPPPQAEQSSSRPFC-----AAELMDATMSKILMSA 65
T_WRKY79                RVAAAVNDLVEVRDGL--LARLRGFLPPPPQAEQSSSRPFC-----AAELMDATMSKILMSA 65
LOC_Os05g49620_WRKY19  MLATELAQLRAMARE----LEAKMDFRVAAR--ELCRA-----LASSVDRSIRLAASC 61
H_WRKY19                MLATELAQLRAMARE----LEAKMDFRVAAR--ELCRA-----LASSVDRSIRLAASC 61
T_WRKY19                MLATELAQLRAMARE----LEAKMDFRVAAR--ELCRA-----LASSVDRSIRLAASC 61
LOC_Os05g46020_WRKY07  YHHPVSGLSAPAGDAAYS--MS--SYFSHGGSTSSS-----ASSFSAALAAATTPPLPDP 63
T_WRKY07                YHHPVSGLSAPAGDAAYS--MS--SYFSHGGSTSSS-----ASSFSAALAAATTPPLPDP 63
H_WRKY07                YHHPVSGLSAPAGDAAYS--MS--SYFSHGGSTSSS-----ASSFSAALAAATTPPLPDP 63
LOC_Os01g51690_WRKY26  FNFCRHGSHAEYD-AVFSGSMARRPSAAPHGGGASGSGSGYGAASYVAPTFGAARFQQHLDLDDYLS 82
H_WRKY26                FNFCRHGSHAEYD-AVFSGSMARRPSAAPHGGGASGSGSGYGAASYVAPTFGAARFQQHLDLDDYLS 82
T_WRKY26                FNFCRHGSHAEYD-AVFSGSMARRPSAAPHGGGASGSGSGYGAASYVAPTFGAARFQQHLDLDDYLS 69
H_WEKY77                SLSESPAERYRQVGGGRYAGEDVDDDDMAAVADVSSY-----LSFDMDDVEYITPEVGFHS 67
T_WRKY77                SLSESPAERYRQVGGGRYAGEDVDDDDMAAVADVSSY-----LSFDMDDVEYITPEVGFHS 67
LOC_Os01g40260_WRKY77  SLSESPAERYRQVGGGRYAGEDVDDDDMAAVADVSSY-----LSFDMDDVEYITPEVGFHS 67
LOC_Os05g39720_WRKY70  RQQSRRSSDDGYNWRKYQKQMKGSENRPSYKCTFFPGCPTKKKVEQSPDGQVTEIVYKGAHSHKPPQN 280
H_WRKY70                RQQSRRSSDDGYNWRKYQKQMKGSENRPSYKCTFFPGCPTKKKVEQSPDGQVTEIVYKGAHSHKPPQN 280
T_WRKY70                RQQSRRSSDDGYNWRKYQKQMKGSENRPSYKCTFFPGCPTKKKVEQSPDGQVTEIVYKGAHSHKPPQN 280
LOC_Os01g53260_WRKY23  FLAVAPAAASATSDGHQHGPLEVLEQPPCSNNLHPDGLVDGPQLAAT---TAVPMMLPAMTSLDWQSLQ 95
H_WRKY23                FLAVAPAAASATSDGHQHGPLEVLEQPPCSNNLHPDGLVDGPQLAAT---TAVPMMLPAMTSLDWQSLQ 95
T_WRKY23                FLAVAPAAASATSDGHQHGPLEVLEQPPCSNNLHPDGLVDGPQLAAT---TAVPMMLPAMTSLDWQSLQ 95
T_WRKY58                MAALSPAGDDWAAS----LILPDGGSAAAGVGEDDLGGG-----VMAAAAEESSCG 77
H_WRKY58                MAALSPAGDDWAAS----LILPDGGSAAAGVGEDDLGGG-----VMAAAAEESSCG 77
LOC_Os05g45230_WRKY58  MAALSPAGDDWAAS----LILPDGGSAAAGVGEDDLGGG-----VMAAAAEESSCG 77
LOC_Os06g44010_WRKY28  VELEAEELRRASEENKLTLEMLRAVVAKYTELQGGVNDMMSAAAAAVNAGNHQSSSTSEGGSVSPSRKRI 177
H_WRKY28                VELEAEELRRASEENKLTLEMLRAVVAKYTELQGGVNDMMSAAAAAVNAGNHQSSSTSEGGSVSPSRKRI 177
T_WRKY28                VELEAEELRRASEENKLTLEMLRAVVAKYTELQGGVNDMMSAAAAAVNAGNHQSSSTSEGGSVSPSRKRI 177
T_WRKY62                AEDLEELRRAMEENARLTRALDAILAGHHAHQ-----ALLAPSLSPPPPSAT 80
H_WRKY62                AEDLEELRRAMEENARLTRALDAILAGHHAHQ-----ALLAPSLSPPPPSAT 1
LOC_Os09g25070_WRKY62  AEDLEELRRAMEENARLTRALDAILAGHHAHQ-----ALLAPSLSPPPPSAT 77
LOC_Os09g25060_WRKY76  ELDRPAGCRGGGDSKSMTNDEAKIVEAKVTFQMS EENRRLTEVIARLYGG--QIPRLGDLGDSASPPRFV 100
H_WRKY76                ELDRPAGCRGGGDSKSMTNDEAKIVEAKVTFQMS EENRRLTEVIARLYGG--QIPRLGDLGDSASPPRFV 7
T_WRKY76                ELDRPAGCRGGGDSKSMTNDEAKIVEAKVTFQMS EENRRLTEVIARLYGG--QIPRLGDLGDSASPPRFV 73

```



```

                290          300          310          320          330          340          350
LOC_Os12g02450_WRKY64 LQLQLSSDSPHDDDDHLDKRRVRKIVSSSSDDDDHSSSKAAEDHNAKPLRQHKKRRRFGD----- 135
HWRKY64 LQLQLSSDSPHDDDDHLDKRRVRKIVSSSSDDDDHSSSKAAEDHNAKPLRQHKKRRRFGD----- 135
T_WRKY64 LQLLLSSSPHDDDDHHVDDKRRVRKIISSS-DDDDHCSSKAAEDHNAKPLRQHKKRRRFGD----- 134
LOC_Os03g21710_WRKY79 MATLGGSG--DIAGEVD AAGRWT SVAESADPMVVRREGESSAGRTRRRRGGGSRSGRGR----- 122
H_WRKY79 MATLGGSG--DIAGEVD AAGRWT SVAESADPMVVRREGESSAGRTRRRRGGGSRSGRGR----- 122
T_WRKY79 MATLGGSG--DIAGEVD AAGRWT SVAESADPMVVRREGESSAGRTRRRRGGGSRSGRGR----- 122
LOC_Os05g49620_WRKY19 FPPP-----EHFPPAAGNAGRDAAFKKR-----KGMKAVRRQVR----- 95
H_WRKY19 FPPP-----EHFPPAAGNAGRDAAFKKRQVMVPGHGGLISGKGMKAVRRQVR----- 108
T_WRKY19 FPPP-----EHFPPAAGNAGRDAAFKKRQVMVPGHGGLISGKGMKAVRRQVR----- 108
LOC_Os05g46020_WRKY07 GSQFDISEFFFDDAPFAAVFNGAPATAA----LPDGAANAT--RSAAEAVPAPAPAAV----- 115
T_WRKY07 GSQFDISEFFFDDAPFAAVFNGAPATAA----LPDGAANAT--RSAAEAVPAPAPAAV----- 115
H_WRKY07 GSQFDISEFFFDDAPP----AGAPATAA----LPDGAANAT--RSAAEAVPAPAPAAV----- 111
LOC_Os01g51690_WRKY26 DDQGVPAPPP-AAVPSASVYTPAPAMAPAEFVVPDAVAAAGG-YPRSVAAAAAAVAGEGR----- 140
H_WRKY26 DDQGVPAPPP-AAVPSASVYTPAPAMAPAEFVVPDAVAAAGG-YPRSVAAAAAAVAGEGR----- 140
T_WRKY26 DDQGVPAPPPAAVPSASVYTPAPAMAPAEFVVPDAVAAAGGYPYPRSVAAAAAAVAGEGR----- 129
H_WEKY77 KQH--NPPFVAAAPLEAGGGREQSRR-----EAAVNLGKMDRGPAPVSGGAATGGV----- 116
T_WRKY77 KQH--NPPFVAAAPLEAGGGREQSRR-----EAAVNLGKMDRGPAPVSGGAATGGV----- 116
LOC_Os01g40260_WRKY77 KQH--NPPFVAAAPLEAGGGREQSRR-----EAAVNLGKMDRGPAPVSGGAATGGV----- 116
LOC_Os05g39720_WRKY70 GRGRGSGYALHGGGAASDAYSSADALSGTFVATPENSSASFDDDEAVNGVSSSLRVASSVGGGEDLDDDE 350
H_WRKY70 GRGRGSGYALHGGGAASDAYSSADALSGTFVATPENSSASFDDDEAVNGVSSSLRVASSVGGGEDLDDDE 350
T_WRKY70 GRGRGSGYALHGGGAASDAYSSADALSGTFVATPENSSASFDDDEAVNGVSSSLRVASSVGGGEDLDDDE 350
LOC_Os01g53260_WRKY23 TCLQVPPFVLEQQQPAAAAQADQYSGENDHGDLOAAESSGAGNKEKQVMAKGGAGRPSGT----- 155
H_WRKY23 TCLQVPPFVLEQQQPAAAAQADQYSGENDHGDLOAAESSGAGNKEKQVMAKGGAGRPSGT----- 155
T_WRKY23 TCLQVPPFVLEQQQPAAAAQADQYSGENDHGDLOAAESSGAGNKEKQVMAKGGAGRPSGK----- 155
T_WRKY58 GSSTVTSSTGGVTEAAAAAATTTTR-----RGRGNGKK--AGGGGR----- 113
H_WRKY58 GSSTVTSSTGGVTEAAAAAATTTTR-----RGRGNGKK--AGGGGR----- 113
LOC_Os05g45230_WRKY58 GSSTVTSSTGGVTEAAAAAATTTTR-----RGRGNGKK--AGGGGR----- 113
LOC_Os06g44010_WRKY28 RSVDSLDDAAHHRKPSPPFVAAAAAAAYASFDQMECTSAAAAAAAKRVVREDCKPKVSKR----- 237
H_WRKY28 RSVDSLDDAAHHRKPSPPFVAAAAAAAYASFDQMECTSAAAAAAAKRVVREDCKPKVSKR----- 237
T_WRKY28 RSVDSLDDAAHHRKPSPPFVAAAAAAAYASFDQMECTSAAAAAAAKRVVREDCKPKVSKR----- 237
T_WRKY62 ARAPSVSTSCAAREDAAPAVAAAAASTACPSRQQPPTAEPRPKVRTVVRADADAT----- 137
H_WRKY62 -----VRTVVRADADAT----- 14
LOC_Os09g25070_WRKY62 ARAPSVSTSCAAREDAAPAVAAAAASTACPSRQQPPTAEPRPKVRTVVRADADAT----- 134
LOC_Os09g25060_WRKY76 SPLSGKKRSRESMETANS CDANSNRHQGGADHAE SFAADDGTCRRIKVSR-VCRI----- 156
H_WRKY76 SPLSGKKRSRESMETANS CDANSNRHQGGADHAE SFAADDGTCRRIKVSR-VCRI----- 63
T_WRKY76 T-----EKRSRESMETANS CDANSNRHQGGADHAE SFAADDGTCRRIKVSR-VCRI----- 125

```

```

                360          370          380          390          400          410          420
LOC_Os12g02450_WRKY64 -----SVSLETPVPHYDGHQWRKYGQKHINNSKHPRSYRCTYR----- 174
HWRKY64 -----SVSLETPVPHYDGHQWRKYGQKHINNSKHPRSYRCTYR----- 174
T_WRKY64 -----SVSLETPVPHYDGHQWRKYGQKHINNSKHPRSYRCTYR----- 173
LOC_Os03g21710_WRKY79 -----SSNKRVAATLEDGHVWRKYGQKDIQNSFYPRSYRCTHK----- 161
H_WRKY79 -----SSNKRVAATLEDGHVWRKYGQKDIQNSFYPRSYRCTHK----- 161
T_WRKY79 -----SSNKRVAATLEDGHVWRKYGQKDIQNSFYPRSYRCTHK----- 161
LOC_Os05g49620_WRKY19 -----VTSVQDTASLDDGLSWRKYGQKDI LGAKYPRAYFRCTHR----- 134
H_WRKY19 -----VTSVQDTASLDDGLSWRKYGQKDI LGAKYPRAYFRCTHR----- 147
T_WRKY19 -----VTSVQDTASLDDGLSWRKYGQKDI LGAKYPRAYFRCTHR----- 147
LOC_Os05g46020_WRKY07 -----ERPR-TERIAFRTKSEIEILDGGYKRWKYGKKS VKNSFNPNRYRCSTE----- 163
H_WRKY07 -----ERPR-TERIAFRTKSEIEILDGGYKRWKYGKKS VKNSFNPNRYRCSTE----- 163
T_WRKY07 -----ERPR-TERIAFRTKSEIEILDGGYKRWKYGKKS VKNSFNPNRYRCSTE----- 159
LOC_Os01g51690_WRKY26 -----DRTT-TDKIAFRTRSDDEILDGGYKRWKYGKKS VKNSFNPNRYRCSTE----- 188
H_WRKY26 -----DRTT-TDKIAFRTRSDDEILDGGYKRWKYGKKS VKNSFNPNRYRCSTE----- 185
T_WRKY26 -----DRTT-TDKIAFRTRSDDEILDGGYKRWKYGKKS VKNSFNPNRYRCSTE----- 177
H_WEKY77 -----PRSKNGSKIAFKTRSEVDVLDGGYRWRKYGKGMVKNSFNPNRYRCSTE----- 165
T_WRKY77 -----PRSKNGSKIAFKTRSEVDVLDGGYRWRKYGKGMVKNSFNPNRYRCSTE----- 165
LOC_Os01g40260_WRKY77 -----PRSKNGSKIAFKTRSEVDVLDGGYRWRKYGKGMVKNSFNPNRYRCSTE----- 165
LOC_Os05g39720_WRKY70 PDSKRWRRDGGDGEVSLVAGNRTVREPRVVQTMSDIDILDGGYRWRKYGQKVVKGNPNPRSYKCTTA 420
H_WRKY70 PDSKRWRRDGGDGEVSLVAGNRTVREPRVVQTMSDIDILDGGYRWRKYGQKVVKGNPNPRSYKCTTA 420
T_WRKY70 PDSKRWRRDGGDGEVSLVAGNRTVREPRVVQTMSDIDILDGGYRWRKYGQKVVKGNPNPRSYKCTTA 420
LOC_Os01g53260_WRKY23 -----KKKASRPRFAFQTRSDNDILDGGYRWRKYGQKAVKNSKHPRSYRCTHH----- 204
H_WRKY23 -----KKKASRPRFAFQTRSDNDILDGGYRWRKYGQKAVKNSKHPRSYRCTHH----- 204
T_WRKY23 -----KKKASRPRFAFQTRSDNDILDGGYRWRKYGQKAVKNSKHPRSYRCTHH----- 204
T_WRKY58 -----TFRFAFHTRSENDILDGGYRWRKYGQKAVKNSDFP----- 148
H_WRKY58 -----TFRFAFHTRSENDILDGGYRWRKYGQKAVKNSDFP----- 148
LOC_Os05g45230_WRKY58 -----TFRFAFHTRSENDILDGGYRWRKYGQKAVKNSDFP----- 148
LOC_Os06g44010_WRKY28 -----FVHADPSDLSLVVKDGYQWRKYGQKVTKDNFCPRAYFRCSFA----- 279
H_WRKY28 -----FVHADPSDLSLVVKDGYQWRKYGQK----- 262
T_WRKY28 -----FVHADPSDLSLVVKDGYQWRKYGQKVTKDNFCPRAYFRCSFA----- 279
T_WRKY62 -----DANSMAETVKDGYQWRKYGQKVTTRDNPYPRAYFRCAFA----- 175
H_WRKY62 -----DANSMAETVKDGYQWRKYGQKVTTRDNPYPRAYFRCAFA----- 52
LOC_Os09g25070_WRKY62 -----DANSMAETVKDGYQWRKYGQKVTTRDNPYPRAYFRCAFA----- 172
LOC_Os09g25060_WRKY76 -----DPSDTSLVVKDGYQWRKYGQKVTTRDNPSPRAYFRCAFA----- 194
H_WRKY76 -----DPSDTSLVVKDGYQWRKYGQKV----- 85
T_WRKY76 -----DPSDTSLVVKDGYQWRKYGQKVTTRDNPSPRAYFRCAFA----- 163

```

|                       | 430              | 440              | 450             | 460             | 470           | 480          | 490 |
|-----------------------|------------------|------------------|-----------------|-----------------|---------------|--------------|-----|
| LOC_Os12g02450_WRKY64 | QEEKCKATKTVQQR   | ED--LHHANSYNGDHP | -----           | VMYTVVYQGHTCCK  | GP-----       | AASADHVVVVEA | 231 |
| HWRKY64               | QEEKCKATKTVQQR   | ED--LHHANSYNGDHP | -----           | IMYTVVYQGHTCCK  | GP-----       | AALADHVVVVEA | 231 |
| T_WRKY64              | QEEKCKATKTVQQR   | ED--LQHANSYNGDHP | -----           | VMYTVVYQGHTCCK  | GP-----       | VASADHVVVVEA | 230 |
| LOC_Os03g21710_WRKY79 | LDQGGARRQTQRCE   | ADPSNYDITYYGEHT  | CRDPSTIIPTAIANA | AAGAASDGPNNNIIS | FATGGVVVANS   |              | 231 |
| H_WRKY79              | LDQGGARRQTQRCE   | ADPSNYDITYYGEHT  | CRDPSTIIPTAIANA | AAGAASDGPNNNIIS | FATGGVVVANS   |              | 231 |
| T_WRKY79              | LDQGGARRQTQRCE   | ADPSNYDITYYGEHT  | CRDPSTIIPTAIANA | AAGAASDGPNNNIIS | FATGGVVVANS   |              | 231 |
| LOC_Os05g49620_WRKY19 | HTQGCNATKQVQRAD  | GDPLLEFDVVYLG    | DHTCG---QAAVAAA | QSAPPEHAGQ---   | EQQRQSSLLAAG  |              | 196 |
| H_WRKY19              | HTQGCNATKQVQRAD  | GDPLLEFDVVYLG    | DHTCG---QAAVAAA | QSAPPEHAGQ---   | EQQRQSSLLAAG  |              | 209 |
| T_WRKY19              | HTQGCNATKQVQRAD  | GDPLLEFDVVYLG    | DHTCG---QAAVAAA | QSAPPEHAGQ---   | EQQRQSSLLAAG  |              | 209 |
| LOC_Os05g46020_WRKY07 | ---GCNVKKRVERDK  | KDDPSYVVTYEGTH   | NHVSPSTVYYASQ   | DAA-----        | SGRFFVAGTQPPG | SLN          | 221 |
| T_WRKY07              | ---GCNVKKRVERDK  | KDDPSYVVTYEGTH   | NHVSPSTVYYASQ   | DAA-----        | SGRFFVAGTQPPG | SLN          | 221 |
| H_WRKY07              | ---GCNVKKRVERDK  | KDDPSYVVTYEGTH   | NHVSPSTVYYASQ   | DAA-----        | SGRFFVAGTQPPG | SLN          | 217 |
| LOC_Os01g51690_WRKY26 | ---GCNVKKRVERDK  | NDRYVVTYEGTH     | NHVCPGTVYYAQ    | DAA-----        | SGRFFVAGISHP- | DLN          | 245 |
| H_WRKY26              | -----            | FVYELVFKGCF      | -----           | -----           | -----         | -----        | 197 |
| T_WRKY26              | ---GCNVKKRVERDK  | NDRYVVTYEGTH     | NHVCPGTVYYAQ    | DAA-----        | SGRFFVAGISHP- | DLN          | 234 |
| H_WEKY77              | ---GCRVKKRVERARD | DARFVVTYDGVH     | N-PAPLHLR--PQL  | PP-----         | PGGYSIAGAPAVV | APH          | 220 |
| T_WRKY77              | ---GCRVKKRVERARD | DARFVVTYDGVH     | N-PAPLHLR--PQL  | PP-----         | PGGYSIAGAPAVV | APH          | 221 |
| LOC_Os01g40260_WRKY77 | ---GCRVKKRVERARD | DARFVVTYDGVH     | N-PAPLHLR--PQL  | PP-----         | PGGYSIAGAPAVV | APH          | 221 |
| LOC_Os05g39720_WRKY70 | ---GCPVRKHVERAS  | NDLRAVITTYEGK    | HNHDVPAARGSA    | AAALYRATPPPQAS  | NAGMMPPTTAQPS | SYLQ         | 487 |
| H_WRKY70              | ---GCPVRKHVERAS  | NDLRAVITTYEGK    | HNHDVPAARGSA    | AAALYRATPPPQAS  | NAGMMPPTTAQPS | SYLQ         | 487 |
| T_WRKY70              | ---GCPVRKHVERAS  | NDLRAVITTYEGK    | HNHDVPAARGSA    | AAALYRATPPPQAS  | NAGMMPPTTAQPS | SYLQ         | 487 |
| LOC_Os01g53260_WRKY23 | ---TCNVKKQVQRLA  | KDTSIVVVTYEGV    | HNHPCEKLMEAL    | TPILK-----      | QLQFLSQF----- |              | 254 |
| H_WRKY23              | ---TCNVKKQVQRLA  | KDTSIVVVTYEGV    | HNHPCEKLMEAL    | TPILK-----      | QLQFLSQF----- |              | 254 |
| T_WRKY23              | ---TCNVKKQVQRLA  | KDTSIVVVTYEGV    | HNHPCEKLMEAL    | TPILK-----      | QLQFLSQF----- |              | 254 |
| T_WRKY58              | -----            | SDDE-LLFSDVDNT   | QTATENLRFIPLGR  | VYITG-----      | -----         | -----        | 180 |
| H_WRKY58              | -----            | SDDELLLFSDDVD    | NTQTATENLRFIPL  | GRVYITG-----    | -----         | -----        | 181 |
| LOC_Os05g45230_WRKY58 | -----            | SDDELLLFSDDVD    | NTQTATENLRFIPL  | GRVYITG-----    | -----         | -----        | 181 |
| LOC_Os06g44010_WRKY28 | P--ACPVKKKVQRS   | ADDNTVLVATYEG    | EHNAQPP-----    | -----           | -----         | -----        | 319 |
| H_WRKY28              | -----            | -----            | -----           | -----           | -----         | -----        | 262 |
| T_WRKY28              | P--ACPVKKKVQRS   | ADDNTVLVATYEG    | EHNAQPP-----    | -----           | -----         | -----        | 319 |
| T_WRKY62              | P--SCPVKKKLQRC   | AEDRSMLVATYEG    | EHNALSTQTTEFV   | ASGCTTSQHAGG    | SSSSPLFCSISIN | SSGR         | 243 |
| H_WRKY62              | P--SCPVKKKLQRC   | AEDRSMLVATYEG    | EHNALSTQTTEFV   | ASGCTTSQHAGG    | SSSSPLFCSISIN | SSGR         | 120 |
| LOC_Os09g25070_WRKY62 | P--SCPVKKKLQRC   | AEDRSMLVATYEG    | EHNALSTQTTEFV   | ASGCTTSQHAGG    | SSSSPLFCSISIN | SSGR         | 240 |
| LOC_Os09g25060_WRKY76 | P--SCPVKKKVQRS   | AEDSSLLVATYEG    | EHNHPPSPRAGEL   | PA-----         | AAGGAGGSLFCS  | SISINSSGP    | 255 |
| H_WRKY76              | -----            | -----            | -----           | -----           | -----         | -----        | 85  |
| T_WRKY76              | P--SCPVKKKVQRS   | AEDSSLLVATYEG    | EHNHPPSPRAGEL   | PA-----         | AVGGAGGSLFCS  | SISINSSGP    | 224 |

|                       | 500           | 510            | 520           | 530          | 540          | 550              | 560 |
|-----------------------|---------------|----------------|---------------|--------------|--------------|------------------|-----|
| LOC_Os12g02450_WRKY64 | SQISTD        | SHCQSPGSSSELQA | -----         | AAHAGDSSQCSN | ISVTCSSSV    |                  | 273 |
| HWRKY64               | SQISTD        | SHCQSPGSSSELQA | -----         | AAHAGDSSQCSN | ISVTCSSSV    |                  | 273 |
| T_WRKY64              | SQISTD        | SHCQSPGSSSELQA | -----         | AAHAGDSSQCSN | ISVTCSSSV    |                  | 272 |
| LOC_Os03g21710_WRKY79 | SRLAREGTTATTT | SAAATQLSSSWG   | TSGGGGGDDVFSS | SGEREMQWDELA | AAVGHVSSVGV  | TSSVGSAP         | 301 |
| H_WRKY79              | SRLAREGTTATTT | SAAATQLSSSWG   | TSGGGGGDDVFSS | SGEREMQWDELA | AAVGHVSSVGV  | TSSVGSAP         | 301 |
| T_WRKY79              | SRLAREGTTATTT | SAAATQLSSSWG   | TSGGGGGDDVFSS | SGEREMQWDELA | AAVGHVSSVGV  | TSSVGSAP         | 301 |
| LOC_Os05g49620_WRKY19 | TEGIHQQVVAE   | FMAAFFLFTS     | -----         | TAAGGVDDGYFS | FISPANSDC    |                  | 238 |
| H_WRKY19              | TEGIHQQVVAE   | FMAAFFLFTS     | -----         | TAAGGVDDGYFS | FISPANSDC    |                  | 251 |
| T_WRKY19              | TEGIHQQVVAE   | FMAAFFLFTS     | -----         | TAAGGVDDGYFS | FISPANSDC    |                  | 251 |
| LOC_Os05g46020_WRKY07 | -----         | -----          | -----         | -----        | -----        | -----            | 221 |
| T_WRKY07              | -----         | -----          | -----         | -----        | -----        | -----            | 221 |
| H_WRKY07              | -----         | -----          | -----         | -----        | -----        | -----            | 217 |
| LOC_Os01g51690_WRKY26 | -----         | -----          | -----         | -----        | -----        | -----            | 245 |
| H_WRKY26              | -----         | -----          | -----         | -----        | -----        | -----            | 197 |
| T_WRKY26              | -----         | -----          | -----         | -----        | -----        | -----            | 234 |
| H_WEKY77              | GRLGLEEA      | EVIALFRGTTATS  | -----         | -----        | -----        | -----            | 245 |
| T_WRKY77              | GRLGLEEA      | EVIALFRGTTATS  | -----         | -----        | -----        | -----            | 246 |
| LOC_Os01g40260_WRKY77 | GRLGLEEA      | EVIALFRGTTATS  | -----         | -----        | -----        | -----            | 246 |
| LOC_Os05g39720_WRKY70 | GGGGVLPAGGY   | GASYGGAPT      | -----         | TQPANGGG     | FAALSGR      | FRDDAT           | 529 |
| H_WRKY70              | GGGGVLPAGGY   | GASYGGAPT      | -----         | TQPANGGG     | FAALSGR      | FRDDAT           | 529 |
| T_WRKY70              | GGGGVLPAGGY   | GASYGGAPT      | -----         | TQPANGGG     | FAALSGR      | FRDDAT           | 529 |
| LOC_Os01g53260_WRKY23 | -----         | -----          | -----         | -----        | -----        | -----            | 254 |
| H_WRKY23              | -----         | -----          | -----         | -----        | -----        | -----            | 254 |
| T_WRKY23              | -----         | -----          | -----         | -----        | -----        | -----            | 254 |
| T_WRKY58              | -----         | -----          | -----         | -----        | -----        | -----            | 180 |
| H_WRKY58              | -----         | -----          | -----         | -----        | -----        | -----            | 181 |
| LOC_Os05g45230_WRKY58 | -----         | -----          | -----         | -----        | -----        | -----            | 181 |
| LOC_Os06g44010_WRKY28 | TAAAAKH       | SQHQPAAA       | AAAVV-----    | -----        | RQQQE        | QAAAAGPSTEVAARKN | 361 |
| H_WRKY28              | -----         | -----          | -----         | -----        | -----        | -----            | 262 |
| T_WRKY28              | TAAAAKH       | SQHQPAAA       | AAAVV-----    | -----        | RQQQE        | QAAAAGPSTEVAARKN | 361 |
| T_WRKY62              | TTTLDLT       | NQAGSGSIASC    | GE-----       | AAAVSGELVT-- | VLSPELRRH    |                  | 283 |
| H_WRKY62              | TTTLDLT       | NQAGSGSIASC    | GE-----       | AAAVSGELVT-- | VLSPELRRH    |                  | 160 |
| LOC_Os09g25070_WRKY62 | TTTLDLT       | NQAGSGSIASC    | GE-----       | AAAVSGELVT-- | VLSPELRRH    |                  | 280 |
| LOC_Os09g25060_WRKY76 | TTTLDLT       | KNGGAVQVVEA    | AHP-----      | -----        | PPPPDLKEVCRE | VASPEFRTA        | 297 |
| H_WRKY76              | -----         | VEAHP          | -----         | -----        | PPPPDLKEVCRE | VASPEFRTA        | 112 |
| T_WRKY76              | TTTLDLT       | KNGGAVQVVEA    | AHP-----      | -----        | PPPPDLKEVCRE | VASPEFRTA        | 266 |

|                       | 570                                                      | 580                 | 590 | 600 | 610 |     |
|-----------------------|----------------------------------------------------------|---------------------|-----|-----|-----|-----|
| LOC_Os12g02450_WRKY64 | VVEDCNKLLDMLPAADELTTDVLLEFDMTAYAP---                     | LDLDINWEMDTNALWA--- |     |     |     | 321 |
| HWRKY64               | VVEDCNKLLDMLPAADELTTDVLLEFDMTAYAP---                     | LDLDINWEMDTNALWV--- |     |     |     | 321 |
| T_WRKY64              | VVEDCNKLLDMLPAADELTTDVLLEFDMTAYAP---                     | LDLDINWEMDTNSLWA--- |     |     |     | 320 |
| LOC_Os03g21710_WRKY79 | AAENDGGNGDTAAGGGGDDGGGAGSFPSSPSAGSLGFVVGPLGSIEDVDDFFPFDP |                     |     |     |     | 356 |
| H_WRKY79              | AAENDGGNGDTAAGGGGDDGGGAGSFPSSPSAGSLGFVVGPLGSIEDVDDFFPFDP |                     |     |     |     | 356 |
| T_WRKY79              | AAENDGGNGDTAAGGGGDDGGGAGSFPSSPSAGSLGFVVGPLGSIEDVDDFFPFDP |                     |     |     |     | 356 |
| LOC_Os05g49620_WRKY19 | QFSSDFSAGSVGVDMDEARFEDLFSST-----                         | LEFFQSEIQNL-----    |     |     |     | 277 |
| H_WRKY19              | QFSSDFSAGSVGVDMDEARFEDLFSST-----                         | LEFFQSEIQNL-----    |     |     |     | 290 |
| T_WRKY19              | QFSSDFSAGSVGVDMDEARFEDLFSST-----                         | LEFFQSEIQNL-----    |     |     |     | 290 |
| LOC_Os05g46020_WRKY07 | -----                                                    | -----               |     |     |     | 221 |
| T_WRKY07              | -----                                                    | -----               |     |     |     | 221 |
| H_WRKY07              | -----                                                    | -----               |     |     |     | 217 |
| LOC_Os01g51690_WRKY26 | -----                                                    | -----               |     |     |     | 245 |
| H_WRKY26              | -----                                                    | -----               |     |     |     | 197 |
| T_WRKY26              | -----                                                    | -----               |     |     |     | 234 |
| H_WKXY77              | -----                                                    | -----               |     |     |     | 245 |
| T_WRKY77              | -----                                                    | -----               |     |     |     | 246 |
| LOC_Os01g40260_WRKY77 | -----                                                    | -----               |     |     |     | 246 |
| LOC_Os05g39720_WRKY70 | GASYSYTSQQQQQPNDAVYYASRAKDEPRDDGIMSFFEQPLLF-----         |                     |     |     |     | 572 |
| H_WRKY70              | GASYSYTSQQQQQPNDAVYYASRAKDEPRDDGIMSFFEQPLLF-----         |                     |     |     |     | 572 |
| T_WRKY70              | GASYSYTSQQQQQPNDAVYYASRAKDEPRDDGIMSFFEQPLLF-----         |                     |     |     |     | 572 |
| LOC_Os01g53260_WRKY23 | -----                                                    | -----               |     |     |     | 254 |
| H_WRKY23              | -----                                                    | -----               |     |     |     | 254 |
| T_WRKY23              | -----                                                    | -----               |     |     |     | 254 |
| T_WRKY58              | -----                                                    | -----               |     |     |     | 180 |
| H_WRKY58              | -----                                                    | -----               |     |     |     | 181 |
| LOC_Os05g45230_WRKY58 | -----                                                    | -----               |     |     |     | 181 |
| LOC_Os06g44010_WRKY28 | LAEQMAATLTRDPGFKAALVTALSGRILELSPTKN-----                 |                     |     |     |     | 396 |
| H_WRKY28              | -----                                                    | -----               |     |     |     | 262 |
| T_WRKY28              | LAEQMAATLTRDPGFKAALVTALSGRILELSPTKN-----                 |                     |     |     |     | 396 |
| T_WRKY62              | LVEEVVQVLKNDAEFVEAVTNAVAARVVDQIPHIPVHL-----              |                     |     |     |     | 321 |
| H_WRKY62              | LVEEVVQVLKNDAEFVEAVTNAVAARVVDQIPHIPVHL-----              |                     |     |     |     | 198 |
| LOC_Os09g25070_WRKY62 | LVEEVVQVLKNDAEFVEAVTNAVAARVVDQIPHIPVHL-----              |                     |     |     |     | 318 |
| LOC_Os09g25060_WRKY76 | LVEQMASALTSDPKFTGALAAAILQKLEPF-----                      |                     |     |     |     | 327 |
| H_WRKY76              | LVEQMASALTSDPKFTGALAAAILQKLEPF-----                      |                     |     |     |     | 142 |
| T_WRKY76              | LVEQMASALTSDPKFTGALAAAILQKLEPF-----                      |                     |     |     |     | 296 |

Fig. S3: Structural variations at amino acid level in the three genotypes.



```

      10      20      30      40      50      60      70
LOC_os01g51690_pW26  --TTATA TTCTGAGATGAATATAGTATAGCTTATTTTCGTATACAACATTAATGGCCCATCTTCAAATA 67
H289702_pW26          1
T3056296_pW26        --TTATA AAAACATAAACCCAACGAGACAATAAATTTAAAAACTAAAAGTTTAA -- AATTTCTGAGGA 64
LOC_os01g53260_pW23  CTTCACTGAAATATAAAAAATCACGATTAAATTAATGTAGAGACCAGATAAATTTCTACTTTTTCCGTTT 70
H1961965_pW23        CTTCACTGAAATATAAAAAATCACGATTAAATTAATGTAGAGACCAGATAAATTTCTACTTTTTCCGTTT 70
T3027906_pW23        CTTCACTGAAATATAAAAAATCACGATTAAATTAATGTAGAGACAAGATAAATTTCTACTTTTTCCGTTT 70
LOC_os06g44010_pW28  -----
H1976995_pW28        -----AAAATGATTTTGAACATGTAAGTTCTGTTCATTAGTGCTAAACTGGTCC 49
T3063501_pW28        -----AAAATGATTTTGAACATGTAAGTTCTGTTCATTAGTGCTAAACTGGTCC 48
LOC_os05g46020_pW07  -----TAACTTTCTGTCAATAGGTTTGATTAGACTCGGGCAA 39
H2000561_pW07        -----TAACTTTCTGTCAATAGGTTTGATTAGACTCGGGCAA 39
T3066720_pW07        -----TAACTTTCTGTCAATAGGTTTGATTAGGCTCGGGCAA 39
H2023318_pW64        -----
T3095730_pW64        -----
LOC_os12g02450_pW64  -----AATTAGTGGTCTAAACTGAACCGCTAAAAAGCTC 36
LOC_os01g40260_pW77  -----CTATGTCATTAATAATAGTTATAAAAGAA 28
T3097007_pW77        -----CTATGTCATTAATAATAGTTATAAAAGAA 28
H1950043_pW77        -----TATGTCATTAATAATAGTTATAAAAGAA 27
LOC_os09g25070_pW62  -----AACACATAGCACCACACTCATATATCCGCAAAATTCCTC-TAAAAGGC 46
H1972014_pW62p       -----AACACATAGCACCACACTCATATATCCGCAAAATTCCTC-TAAAAGGC 46
T3091546_pW62        -----AACACATAGCACCACACTCATATATCCGCAAAATTCCTC-TAAAAGGC 46
LOC_os05g39720_pW70  -----TACAACGTGCTCACTGACATACA-GTCCGAGCAGAC-ACCTGAA 40
H334389_pW70         -----TACAACGTGCTCACTGACATACA-GTCCGAGCAGAC-ACCTGAA 40
T3094952_pW70        -----TACAACGTGCTCACTGACATACA-GTCCGAGCAGAC-ACCTGAA 40
LOC_os05g45230_pW58  -----GAAACGGTCCCGAGGCAGTCCCTGCGTCCGCGTTGCGCAT-CACCGAG 46
H1850565_pW58p       -----GAAACGGTCCCGAGGCAGTCCCTGCGTCCGCGTTGCGCAT-CACCGAG 46
T3075919_pW58        -----GAAACGGTCCCGAGGCAGTCCCTGCGTCCGCGTTGCGCAT-CACCGAG 46
LOC_os03g21710_pW79  -----TCTCTGTCTGGTACTTTAATAACCCCTCGT-TGATATA 41
H1952278_pW79        -----TCTCTGTCTGGTACTTTAATAACCCCTCGT-TGATATA 41
T3070072_pW79        -----TCTCTGTCTGGTACTTTAATAACCCCTCGT-TGATATA 41
LOC_os05g49620_pW19  -----CAATCAGGCTGGCAAGAAAGAACACTGT-GCCAAG 34
H2014700_pW19        -----AATCAGGCTGGCAAGAAAGAACACTGT-GCCAAG 33
T3058779_pW19        -----CGTCCAAAATGTAACAACCTTAGTGGT-CCTGTT 34
LOC_os09g25060_pW76  -----GTCTTAGAATAATTAATTTGTTTTAAAAGTTTCACTCATC 41
T3076120_pW76        -----TTTTAAAAGTTTCACTCATC 20
H1974322_pW76p       -----GTCTTAGAATAATTAATTTGTTTTAAAAGTTTCACTCATC 41

```

```

      80      90      100     110     120     130     140
LOC_os01g51690_pW26  ACAAATAATGGAAAT-TTTCAAAAAGAAAGGTTTCATCTAAAATATAT-CGATGATAAATGACAAATTAAG 135
H289702_pW26          1
T3056296_pW26        CAATGAATAAAAGCG-GTGACAAAATGATAGATCGAACAAATAAATAA-AGAAGGGGATAACAAAAAAA 132
LOC_os01g53260_pW23  CAGGTTATAAGACTT-TCTAACAAATTTGATCTAGATTCAATTAATAATATATAAATATGGATAATGTTA 139
H1961965_pW23        CAGGTTATAAGACTT-TCTAACAAATTTGATCTAGATTCAATTAATAATATATAAATATGGATAATGTTA 139
T3027906_pW23        CAAGTTATAAGACTT-TCTAACAAATTTATCTAGATTCAATTAATAATATATAAATATGAATAATGTTA 139
LOC_os06g44010_pW28  -----TAACTTTCTATAAAAAAAA-GA 23
H1976995_pW28        TAGAATACAGTGTTT-TCTTAATAATAAAAACTTATTACACTGTACTAACATTTCTATAAAAAAAA-GA 116
T3063501_pW28        TAGAATACAGTGTTT-TCTTAATAATAAAAACTTATTACACTGTACTAACATTTCTATAAAAAAAA-GA 116
LOC_os05g46020_pW07  GCAGGAACACACCTGATCCAAGACCCGATACCTCTTGGACAATCGGAGCAGGATAGTATATAGCAGGCAA 109
H2000561_pW07        GCAGGAACACACCTGATCCAAGACCCGATACCTCTTGGACAATCGGAGCAGGATAGTATATAGCAGGCAA 109
T3066720_pW07        GCAGGAACACACCTGATCCAAGACCCGATACCTCTTGGACAATCGGAGCAGGATAGTATATAGCAGGCAA 109
H2023318_pW64        -----
T3095730_pW64        -----
LOC_os12g02450_pW64  AGGTGATTAATAGAACTTGGTGTGTAACGTACTACCTGATGATCTATCAAGCTAGCACATAAGAACTGA 106
LOC_os01g40260_pW77  CTGAAAAAATGAAAGAT-GAATTAATATGTGATATATCATCCACAAGTATGCAACTTAAATTC-A 94
T3097007_pW77        CTGAAAAAATGAAAGAT-GAATTAATATGTGATATATCATCCACAAGTATGCAACTTAAATTC-A 94
H1950043_pW77        CTGAAAAAATGAAAGAT-GAATTAATATGTGATATATCATCCACAAGTATGCAACTTAAATTC-A 93
LOC_os09g25070_pW62  TAAAAACACACTAGAAAGGACGAAACCAACGACACATTTCTAATCTCATTAATAATCTATGAAAGCCCCCT 116
H1972014_pW62p       TAAAAACACACTAGAAAGGACGAAACCAACGACACATTTCTAATCTCATTAATAATCTATGAAAGCCCCCT 116
T3091546_pW62        TAAAAACACACTAGAAAGGACGAAACCAACGACACATTTCTAATCTCATTAATAATCTATGAAAGCCCCCT 116
LOC_os05g39720_pW70  ATG--CAAATTTCAACAGTAGAATCAGTCAGCTGATTTAA-ATATAAACAGGGGTAAAGATTTAAGCA-- 105
H334389_pW70         ATG--CAAATTTCAACAGTAGAATCAGTCAGCTGATTTAA-ATATAAACAGGGGTAAAGATTTAAGCA-- 105
T3094952_pW70        ATG--CAAATTTCAACAGTAGAATCAGTCAGCTGATTTAA-ATATAAACAGGGGTAAAGATTTAAGCA-- 105
LOC_os05g45230_pW58  GCGGCCCGACGTCACCGTTGCAGCCATTGACGCGTTCCCT-GGTAGCCGTTGTGGCCACCCGACCT-- 113
H1850565_pW58p       GCGGCCCGACGTCACCGTTGCAGCCATTGACGCGTTCCCT-GGTAGCCGTTGTGGCCACCCGACCT-- 113
T3075919_pW58        GCGGCCCGACGTCACCGTTGCAGCCATTGACGCGTTCCCT-GGTAGCCGTTGTGGCCACCCGACCT-- 113
LOC_os03g21710_pW79  CTTGTTCTTATATCGATTTCTAATAATTTCTGTCCCTACCTGGAGGAAAAG-AGACACCTGTGTGACACGTCG 109
H1952278_pW79        CTTGTTCTTATATCGATTTCTAATAATTTCTGTCCCTACCTGGAGGAAAAG-AGACACCTGTGTGACACGTCG 109
T3070072_pW79        CTTGTTCTTATATCGATTTCTAATAATTTCTGTCCCTACCTGGAGGAAAAG-AGACACCTGTGTGACACGTCG 109
LOC_os05g49620_pW19  CTAATTCAC-TGTCCAAGCTGATAATACCTTATCATTTTAAAAAACAAGTCTTTAAAAAATAATTTTG 103
H2014700_pW19        CTAATTCAC-TGTCCAAGCTGATAATACCTTATCATTTTAAAAAACAAGTCTTTAAAAAATAATTTTG 102
T3058779_pW19        CGAATCTAC-CGCAAGGATGAAGATTAAGTGTGCGGCAAAACGAGATAAGTCAATAGCATATGATTAAT 103
LOC_os09g25060_pW76  TTCCCTTATCGATCTAAACAAGAACATGCTTTTTTTTTTTTACCTTTGGTAAGTATTTGTATAATCATGG 111
T3076120_pW76        TTCCCTTATCGATCTAAACAAGAACATGCTTTTTTTTTTTTACCTTTGGTAAGTATTTGTATAATCATGG 111
H1974322_pW76p       TTCCCTTATCGATCTAAACAAGAACATGCTTTTTTTTTTTTACCTTTGGTAAGTATTTGTATAATCATGG 111

```

```

      150       160       170       180       190       200       210
LOC_os01g51690_pW26 AGGGGAGAAGCAACATGCTTATAATGGAGTAAAGCGTAGGCCTATAAACCCCATGATAATCATATTTGA- 204
H289702_pW26      1
T3056296_pW26      TAAGGGTTAGCAACTGGTGCCGACTTTTAAAAACTATAAAAATTAGAAATATGTGGATGATAAGGTTTGGT- 201
LOC_os01g53260_pW23 AAAAGTCTTATAACCTGAAACAGAGGTAATAGTAAATATCGACGATGCACGTATAATCTCTAGCTCGTA- 208
H1961965_pW23     AAAAGTCTTATAACCTGAAACAGAGGTAATAGTAAATATCGACGATGCACGTATAATCTCTAGCTCGTA- 208
T3027906_pW23     AAAAATCTTATAACCTGAAACGAGGTAAGTAAATATCGACGATGCACGTATAATCTCTAGCTCGTA- 208
LOC_os06g44010_pW28 GAAGAACTTTTCTCAGAGACAGCATCAATAAGACAAAAAAAAGTTACATGGGAAAAAGAGAAAAACACA- 92
H1976995_pW28     GAAGAACTTTTCTCAGAGACAGCATCAATAAGACAAAAAAAAGTTACATGGGAAAAAGAGAAAAACACA- 185
T3063501_pW28     GAAGAACTTTTCTCAGAGACAGCATCAATAAGACAAAAAAAAGTTACATGGGAAAAAGAGAAAAACACA- 185
LOC_os05g46020_pW07 AATCAACGCCACGTCGGGTGCGGTGCGTATTAAAAAATCGATA -- ATATATGCATGGCTAGATA- 175
H2000561_pW07     AATCAACGCCACGTCGGGTGCGGTGCGTATTAAAAAATCGATA -- ATATATGCATGGCTAGATA- 175
T3066720_pW07     AATCAACGCCACGTCGGGTGCGGTGCGTATTAAAAAATCGATA -- ATATATGCATGGCTAGATA- 175
H2023318_pW64     TACTCCCATCCTACATAGACAACATGTAGTACAATGTGG 42
T3095730_pW64     ----- 1
LOC_os12g02450_pW64 GGCCCTGTTTAGAGTGGGACTAAAACCTTTTAAAGTCCCTATCACATCGGATGTTTAAAAATTAATATAAAAT 176
LOC_os01g40260_pW77 -ACTTAAAAATTTGTTTTTCTGTGACATATAGAAAGTTGAATTTTCAGTTGCATAAATATGCAGTGATAT 163
T3097007_pW77     -ACTTAAAAATTTGTTTTTCTGTGACATATAGAAAGTTGAATTTTCAGTTGCATAAATATGCAGTGATAT 163
H1950043_pW77     -ACTTAAAAATTTGTTTTTCTGTGACATATAGAAAGTTGAATTTTCAGTTGCATAAATATGCAGTGATAT 162
LOC_os09g25070_pW62 TGCTTGTGACCAATATTCAGGTACAGAAATCAATGATGTACATCCACA -TCACCTTAACCTTCTTAGATTT 185
H1972014_pW62p    TGCTTGTGACCAATATTCAGGTACAGAAATCAATGATGTACATCCACA -TCACCTTAACCTTCTTAGATTT 185
T3091546_pW62     TGCTTGTGACCAATATTCAGGTACAGAAATCAATGATGTACATCCACA -TCACCTTAACCTTCTTAGATTT 185
LOC_os05g39720_pW70 -GCTAAAAAGCGATACAAACCCCTAATTAACATACTACTACTAAATAAGCTACCCCAACCAT -CTGACATGG 173
H334389_pW70     -GCTAAAAAGCGATACAAACCCCTAATTAACATACTACTACTAAATAAGCTACCCCAACCAT -CTGACATGG 173
T3094952_pW70     -GCTAAAAAGCGATACAAACCCCTAATTAACATACTACTACTAAATAAGCTACCCCAACCAT -CTGACATGG 173
LOC_os05g45230_pW58 -GCCCCAC -GTGTTCCGTCCTCCATCA -CGTTGCCGCAC -ACCCGGGTCATGGCGCCGCACTTCCATGC 179
H1850565_pW58p    -GCCCCAC -GTGTTCCGTCCTCCATCA -CGTTGCCGCAC -ACCCGGGTCATGGCGCCGCACTTCCATGC 179
T3075919_pW58     -GCCCCAC -GTGTTCCGTCCTCCATCA -CGTTGCCGCAC -ACCCGGGTCATGGCGCCGCACTTCCATGC 179
LOC_os03g21710_pW79 TCCCGTGTAGCCA -AAACCACTGGCCGTTCCGGTCTCGGTGTTTCCAGTTTCCATCAACCGTAAGCGTGT 177
H1952278_pW79     TCCCGTGTAGCCA -AAACCACTGGCCGTTCCGGTCTCGGTGTTTCCAGTTTCCATCAACCGTAAGCGTGT 177
T3070072_pW79     TCCCGTGTAGCCA -AAACCACTGGCCGTTCCGGTCTCGGTGTTTCCAGTTTCCATCAACCGTAAGCGTGT 177
LOC_os05g49620_pW19 ACCATTTTT -TTATTAATAAT -AAAAATCAATAAATATCCTATTCCAGTGAAGCATTTTTTAACACTT 171
H2014700_pW19     ACCATTTTT -TTATTAATAAT -ANNNNNNNNNNNNNNNNNNNNNNNNNNNNNNNNNNNNNNNNNNNNNNNN 170
T3058779_pW19     TAAATTTTAAATTAATAAATCTTAAAAATGGAATTTATAGAAATTTTTATAGTAACTTTTATAGAAAGT 173
LOC_os09g25060_pW76 CGATGATGTGAACACGCGTGGCGAACGTAACACTATCATTTTTTTTTACTTAGTAAAGACAACAAAACCAT 181
T3076120_pW76     CGATGATGTGAACACGCGTGGCGAACGTAACACTATCATTTTTTTTTACTTAGTAAAGACAACAAAACCAT 158
H1974322_pW76p    CGATGATGTGAACACGCGTGGCGAACGTAACACTATCATTTTTTTTTACTTAGTAAAGACAACAAAACCAT 181

```

```

      220       230       240       250       260       270       280
LOC_os01g51690_pW26 TTTTAAAA -TCTTAAGGA --ATTCAAGCAATTTAAAAATTCGAAATTCGACCCCTGAAATGGTG -AGAAT 269
H289702_pW26      1
T3056296_pW26     TTTTCAAA -GTATTAAGA --TAAFAAGATAGCTATTTAACAATAATTTAAATAAAATCATATTA -AAAA 266
LOC_os01g53260_pW23 AATAAAATTTGCATGAACA --GTTGGATATATTAATAAACCCTGCTGCTGAGTGCTGGCATTTTTGCACGAA 275
H1961965_pW23     AATAAAATTTGCATGAACA --GTTGGATATATTAATAAACCCTGCTGCTGAGTGCTGGCATTTTTGCACGAA 275
T3027906_pW23     AATAAAATTTGCATGAACA --GTTGGATATATTAATAAACCCTGCTGCTGAGTGCTGGCATTTTTGCACGAA 275
LOC_os06g44010_pW28 ACTAAAAAGAGAAAAACACATATTAACCAATTAACATTTCTCTCTGTCCCTGAAGACATACTTCATTTT 162
H1976995_pW28     ACTAAAAAGAGAAAAACACATATTAACCAATTAACATTTCTCTCTGTCCCTGAAGACATACTTCATTTT 255
T3063501_pW28     ACTAAAAAGAGAAAAACACATATTAACCAATTAACATTTCTCTCTGTCCCTGAAGACATACTTCATTTT 255
LOC_os05g46020_pW07 ACTAAACAGAGATTTATGA --ATCAGCACATATGATTTGGGAGCATCATGTGAGACATGTCGAACACATG 242
H2000561_pW07     ACTAAACAGAGATTTATGA --ATCAGCACATATGATTTGGGAGCATCATGTGAGACATGTCGAACACATG 242
T3066720_pW07     ACTAAACAGAGATTTATGA --ATCAGCACATATGATTTGGGAGCATCATGTGAGACATGTCGAACACATG 242
H2023318_pW64     AGTGGAGTTGAAATATCAACTGTAGAATTCACTAGTAGCTAGTATAGTTCTAGTAGAATTAATAGTAG 112
T3095730_pW64     ----- 1
LOC_os12g02450_pW64 ATTAACGTAGACTATTAATAAAAACCCATCCATAACTCTGGACTAATTTACGAGACGAATCTAATGAGCC 246
LOC_os01g40260_pW77 ATCA -TAT ---- ACTATATCTTAATACATTTTTCTCTTTTTTT -TAATTTTTTCAATCATTTTGT 225
T3097007_pW77     ATCA -TAT ---- ACTATATCTTAATACATTTTTCTCTTTTTTT -TAATTTTTTCAATCATTTTGT 225
H1950043_pW77     ATCA -TAT ---- ACTATATCTTAATACATTTTTCTCTTTTTTT -TAATTTTTTCAATCATTTTGT 224
LOC_os09g25070_pW62 ACCGCTCT ---- AACATCCCACATACCCGATTAAGTCATCATTT -AAAAGTGTATTGCGGGGATTGA 248
H1972014_pW62p    ACCGCTCT ---- AACATCCCACATACCCGATTAAGTCATCATTT -AAAAGTGTATTGCGGGGATTGA 248
T3091546_pW62     ACCGCTCT ---- AACATCCCACATACCCGATTAAGTCATCATTT -AAAAGTGTATTGCGGGGATTGA 248
LOC_os05g39720_pW70 TTTACTACTTCAGAAGGCAGCTCCCAAATTCATTAAAAAAAACCACTAGTAATTTAATTAAGCAAAATTTT 243
H334389_pW70     TTTACTACTTCAGAAGGCAGCTCCCAAATTCATTAAAAAAAACCACTAGTAATTTAATTAAGCAAAATTTT 243
T3094952_pW70     TTTACTACTTCAGAAGGCAGCTCCCAAATTCATTAAAAAAAACCACTAGTAATTTAATTAAGCAAAATTTT 243
LOC_os05g45230_pW58 CGCAGGAC -CAAAGCGGTGCGCGACGGCGCTCCTGCGCAACCACCTAGTCCACGGTATGGAAAGAGCGGC 247
H1850565_pW58p    CGCAGGAC -CAAAGCGGTGCGCGACGGCGCTCCTGCGCAACCACCTAGTCCACGGTATGGAAAGAGCGGC 247
T3075919_pW58     CGCGGGAC -CAAAGCGGTGCGCGACGGCGCTCCTGCGCAACCACCTAGTCCACGGTATGGAAAGAGCGGC 235
LOC_os03g21710_pW79 CATTCACGCGCCAATGTATACTAATGAATCTTTATTTTGTCTGTCATCATGCATTCATGCTTGTGTAC 247
H1952278_pW79     CATTCACGCGCCAATGTATACTAATGAATCTTTATTTTGTCTGTCATCATGCATTCATGCTTGTGTAC 247
T3070072_pW79     CATTCACGCGCCAATGTATACTAATGAATCTTTATTTTGTCTGTCATCATGCATTCATGCTTGTGTAC 247
LOC_os05g49620_pW19 GTTCAAA -ACAACAAC -TAGTATTAATCAACCCGATGAAGTAGC -AAGAATCCTATG -ATCAATAC ---T 234
H2014700_pW19     GTTCAAA -ACAACAAC -TAGTATTAATCAACCCGATGAAGTAGC -AAGAATCCTATG -ATCAATAC ---T 233
T3058779_pW19     TTTCAAAACACCAATT -TAGTTTGA AAAACGCTAACGGAAACCAAGAAAAAATGATCTTTAAT ---T 239
LOC_os09g25060_pW76 CCGTGGGTATTAAGAGCAAGTACAAATTTGAAAGATATAGCTTAGCTACAAGCACATATGAAAAAGGAGA 251
T3076120_pW76     CCGTGGGTATTAAGAGCAAGTACAAATTTGAAAGATATAGCTTAGCTACAAGCACATATGAAAAAGGAGA 228
H1974322_pW76p    CCGTGGGTATTAAGAGCAAGTACAAATTTGAAAGATATAGCTTAGCTACAAGCACATATGAAAAAGGAGA 251

```



```

290      300      310      320      330      340      350
LOC_os01g51690_pW26 CTTACCCCTTAACCTTAAT--ACTCCCTC-CCTTTCAAAATATAAGAC-GTTTAACTTTGGTT-CAAG 333
H289702_pW26 1
T3056296_pW26 TAGATAAATTCGTATGGGT--ACTAGCCG-CAATATTCGCGTGGCTAC-CAGCTAGTTTTTTAGATAAT 332
LOC_os01g53260_pW23 CGTGTGCATGCACCTGACCCCAACAAACG-CAAAGCTACCATTGCATC-GACC-GCCTCCATCGGCCAT 341
H1961965_pW23 CGTGTGCATGCACCTGACCCCAACAAACG-CAAAGCTACCATTGCATC-GACC-GCCTCCATCGGCCAT 341
T3027906_pW23 CGTGTGCATGCACCTGACCCCAACAAACG-CAAAGCTACCATTGCATC-GACC-GCCTCCATCGGCCAT 341
LOC_os06g44010_pW28 TTTCATATTTTAAAGTCGTTTTAGTTTTT-CTAATTAACCTTTTTTAA-GTTTGATGAATTTTGAAGAAA 230
H1976995_pW28 TTTCATATTTTAAAGTCGTTTTAGTTTTT-CTAATTAACCTTTTTTAA-GTTTGATGAATTTTGAAGAAA 323
T3063501_pW28 TTTCATATTTTAAAGTCGTTTTAGTTTTT-CTAATTAACCTTTTTTAA-GTTTGATGAATTTTGAAGAAA 323
LOC_os05g46020_pW07 CCCGTGCCATCGAACACAGTATCCGTTGGGTAAAATCGCTATCGCTGCTCAGTCCAAAGTAGACGGAGCT 312
H2000561_pW07 CCCGTGCCATCGAACACAGTATCCGTTGGGTAAAATCGCTATCGCTGCTCAGTCCAAAGTAGACGGAGCT 312
T3066720_pW07 CCCGTGCCATCGAACACAGTATCCGTTGGGTAAAATCGCTATCGCTGCTCAGTCCAAAGTAGACGGAGCT 312
H2023318_pW64 TAAAT-AGTTTAGTGCATCTATATA--TATACCACCGTTG-GAGTATAACTCGCGTAGTATTC 175
T3095730_pW64 ---TATATA--TATACCACCGTTG-GAGTATAACTCGCGTAGTATTC 44
LOC_os12g02450_pW64 TAAATTAATCCATGATTAGCTATGTGATGCTACAGTAAACATTCCTCTAATTAAGATAATAGGCTTAA 316
LOC_os01g40260_pW77 GTGACGTACTCCCTCCGTC-C---AAAAAAGACAAACCCCTGAGTTTT-CGTGTCCAACGTTTGAATTG 288
T3097007_pW77 GTGACGTACTCCCTCCGTC-C---AAAAAAGACAAACCCCTGAGTTTT-CGTGTCCAACGTTTGAATTG 288
H1950043_pW77 GTGACGTACTCCCTCCGTC-C---AAAAAAGACAAACCCCTGAGTTTT-CGTGTCCAACGTTTGAATTG 287
LOC_os09g25070_pW62 ACTAAATCCGTATTTGGTA-T--TGACACAAACATATACGAAAAAGAACATATTGGACATCACGTTG 312
H1972014_pW62p ACTAAATCCGTATTTGGTA-T--TGACACAAACATATACGAAAAAGAACATATTGGACATCACGTTG 312
T3091546_pW62 ACTAAATCCGTATTTGGTA-T--TGACACAAACATATACGAAAAAGAACATATTGGACATCACGTTG 312
LOC_os05g39720_pW70 GCTACGCTACTTCGTGGTT-C---TATATGTAAGACACCACGAAAGTAAATTTTAAAGAAAAAATA 307
H334389_pW70 GCTACGCTACTTCGTGGTT-C---TATATGTAAGACACCACGAAAGTAAATTTTAAAGAAAAAATA 307
T3094952_pW70 GCTACGCTACTTCGTGGTT-C---TATATGTAAGACACCACGAAAGTAAATTTTAAAGAAAAAATA 307
LOC_os05g45230_pW58 ACCACCTTAATTCGCGTC--CCTGTTATACAGTAGAGGTATATTTATGCAAAATTTTTTTCATGCAGTA 315
H1850565_pW58p ACCACCTTAATTCGCGTC--CCTGTTATACAGTAGAGGTATATTTATGCAAAATTTTTTTCATGCAGTA 315
T3075919_pW58 ACCATCTTAATTCGCGTC--CCTGTTATACAGTAGAGGTATATTTATGCAAAATTTTTTTCATGCAGTA 303
LOC_os03g21710_pW79 AGGAGGAGACCCATCCATTACGTACGTATAAAGAGAAAGTGAAGCTACAAT--ATATGCAGCTCGATCG 314
H1952278_pW79 AGGAGGAGACCCATCCATTACGTACGTATAAAGAGAAAGTGAAGCTACAAT--ATATGCAGCTCGATCG 314
T3070072_pW79 AGGAGGAGACCCATCCATTACGTACGTATAAAGAGAAAGTGAAGCTACAAT--ATATGCAGCTCGATCG 314
LOC_os05g49620_pW19 AAAT-AATATTCCTTCGTT-CTAAAATATA-ACAACCTTAGTGGTCTTATTCGAATCTACCGTAAAGATG 301
H2014700_pW19 AAAT-AATATTCCTTCGTT-CTAAAATATA-ACAACCTTAGTGGTCTTATTCGAATCTACCGTAAAGATG 300
T3058779_pW19 AGTTTGAAGCGGGCCATTATAGATTAGATATAAATACTAAGGGTG-TGTTGGGACCTCT---AGGTTTC 304
LOC_os09g25060_pW76 AAAAAACAGACCAATAAAT--TGTAGTGTGAGAGATGAGCCAAGTATTAATGATTCAATGTAT----- 312
T3076120_pW76 AAAAAACAGACCAATAAAT--TGTAGTGTGAGAGATGAGCCAAGTATTAATGATTCAATGTAT----- 296
H1974322_pW76p AAAAAACAGACCAATAAAT--TGTAGTGTGAGAGATGAGCCAAGTATTAATGATTCAATGTAT----- 312

```

```

360      370      380      390      400      410      420
LOC_os01g51690_pW26 TCAAACCTGT--TTCAAATTTGTAGAAAAATAAATAAATATTTTTAGCTCAACACAAATTTATATGAAA 400
H289702_pW26 1
T3056296_pW26 GAGAAGTAT--TTTCAATCGGTAGATACATGCCGCTCCCTCTGTTTCAACATATAAACATTTCTAGGAT 399
LOC_os01g53260_pW23 TCAAACCTGC--AAGCGCTCGACCGGTTCATCATTCATCAGCTAAAAAAGTCAAAAAGACGCCAAGAGAA 408
H1961965_pW23 TCAAACCTGC--AAGCGCTCGACCGGTTCATCATTCATCAGCTAAAAAAGTCAAAAAGACGCCAAGAGAA 408
T3027906_pW23 TCAAACCTGC--AAGCGCTCGACCGGTTCATCATTCATCAGCTAAAAAAGTCAAAAAGACGCCAAGAGAA 408
LOC_os06g44010_pW28 AATATAGCA--ATGTTTTCAATAFAAAACAAATATGCTATCAAAA--TATATTTAATAATTTAATGAAC 295
H1976995_pW28 AATATAGCA--ATGTTTTCAATAFAAAACAAATATGCTATCAAAA--TATATTTAATAATTTAATGAAC 388
T3063501_pW28 AATATAGCA--ATGTTTTCAATAFAAAACAAATATGCTATCAAAA--TATATTTAATAATTTAATGAAC 388
LOC_os05g46020_pW07 AAAAAFAAAA--TAAAGAGAGATGCCACTCATTAAATTTGTTTTATTTAGATCGAATTTAAACTGATAT 379
H2000561_pW07 AAAAAFAAAA--TAAAGAGAGATGCCACTCATTAAATTTGTTTTATTTAGATCGAATTTAAACTGATAT 379
T3066720_pW07 AAAAAFAAAA--TAAAGAGAGATGCCACTCATTAAATTTGTTTTATTTAGATCGAATTTAAACTGATAT 379
H2023318_pW64 ATGACAAAAT-TAGTGGTCTAAAACGTAAACCGCTAAAAAGCTCAGGTGATTAATTAGAAGCTGGTGTG- 243
T3095730_pW64 ATGACAAAAT-TAGTGGTCTAAAACGTAAACCGCTAAAAAGCTCAGGTGATTAATTAGAAGCTGGTGTG- 112
LOC_os12g02450_pW64 AAAAAATTTGTCGTGAATAGCTTTCAATGATGATTAATGTTTTG-TAAGTAGCTATATTTAATACTCT 385
LOC_os01g40260_pW77 TTCGTTTTAT-----ATGAAATTTTTTATAAATAGTATTTTCATTGTTGTTAGATAATAAAACATGA 350
T3097007_pW77 TTCGTTTTAT-----ATGAAATTTTTTATAAATAGTATTTTCATTGTTGTTAGATAATAAAACATGA 350
H1950043_pW77 TTCGTTTTAT-----ATGAAATTTTTTATAAATAGTATTTTCATTGTTGTTAGATAATAAAACATGA 349
LOC_os09g25070_pW62 TAAGCTCGATGTCAATGAATTAAGTTTTCTGTAACCGTCAGTCT-GTCATCTTAAAGCACACAGCAG 381
H1972014_pW62p TAAGCTCGATGTCAATGAATTAAGTTTTCTGTAACCGTCAGTCT-GTCATCTTAAAGCACACAGCAG 381
T3091546_pW62 TAAGCTCGATGTCAATGAATTAAGTTTTCTGTAACCGTCAGTCT-GTCATCTTAAAGCACACAGCAG 381
LOC_os05g39720_pW70 CTCTATAAAATAT-GATTATTTACTAGATGTACAATATCGTTTAGTGTACCATAAAAATACCAGGAGCAA 376
H334389_pW70 CTCTATAAAATAT-GATTATTTACTAGATGTACAATATCGTTTAGTGTACCATAAAAATACCAGGAGCAA 376
T3094952_pW70 CCCTATAAAATAT-GATTATTTACTAGATGTACAATATCGTTTAGTGTACCATAAAAATACCAGGAGCAA 376
LOC_os05g45230_pW58 ---TATAAATGC-AAAAATTAATGAAATATATATTTTCTTTTTTTTTCTTGTTAAGTACTCGACAGGA 381
H1850565_pW58p ---TATAAATGC-AAAAATTAATGAAATATATATTTTCTTTTTTTTTCTTGTTAAGTACTCGACAGGA 381
T3075919_pW58 ---TATAAATGC-AAAAATTAATGAAATATATATTTTCTTTTTTTTTCTTGTTAAGTACTCGACAGGG 369
LOC_os03g21710_pW79 ATCGCTAGCTGCTATCGGCTAGCGACAGGGCTCGAGTTCGATGTCAATCAGTGA---TCCAATGTTAGAT 380
H1952278_pW79 ATCGCTAGCTGCTATCGGCTAGCGACAGGGCTCGAGTTCGATGTCAATCAGTGA---TCCAATGTTAGAT 380
T3070072_pW79 ATCGCTAGCTGCTATCGGCTAGCGACAGGGCTCGAGTTCGATGTCAATCAGTGA---TCCAATGTTAGAT 380
LOC_os05g49620_pW19 AAGATTAAGTGTGCGCCGAAAACGAG-ATAAGTCATTAGCATATGATTAATTAATTTTAAATTTAAAA 370
H2014700_pW19 AAGATTAAGTGTGCGCCGAAAACGAG-ATAAGTCATTAGCATATGATTAATTAATTTTAAATTTAAAA 369
T3058779_pW19 CCAATCCAAATCCCTCGTTTTTCGCGCCAGCTTTTTTCAAAAC-TGCTAAACGGTGCCTTTTTTAAAAA 373
LOC_os09g25060_pW76 ---AGTAGACTAATTAAGTGACTGTAGATGATGATTAATTTTGAAGGTTAGCAGTGGGT 369
T3076120_pW76 TAAACTATTGTATAGTAGACTAATTAAGTGACTGTAGATGATGATTAATTTTGAAGGTTAGCAGTGGGT 366
H1974322_pW76p ---AGTAGACTAATTAAGTGACTGTAGATGATGATTAATTTTGAAGGTTAGCAGTGGGT 369

```

```

      430      440      450      460      470      480      490
LOC_os01g51690_pW26 ATATATTC AATTATTAATTTAA --- TGA AACTAT - TT - ATAAA - TATTACTATA --- TTTATGCA 456
H289702_pW26      TAAAATTT ATACATAATACAAG --- TATTTCTATGTC - ACCAA - TTCCAATATACGAAATCTATACA 23
T3056296_pW26      GAAACGAT CTAGAACGAACC - G - TGCCGTCCTGCC - GTGAA - TCAGAACTTTTCCCTAGTTA - ACT 461
H1961965_pW23      GAAACGAT CTAGAACGAACC - G - TGCCGTCCTGCC - GTGAA - TCAGAACTTTTCCCTAGTTA - ACT 468
T3027906_pW23      GAAACGAT CTAGAACGAACC - G - TGCCGTCCTGCC - GTGAA - TCAGAACTTTTCCCTAGTTA - ACT 468
LOC_os06g44010_pW28 TAATTTTA TTTTGTAGATGTTG --- CTAATTTTCTCT - GTAAA - CTTAATTA AAT - CTTAAAAA 353
H1976995_pW28      TAATTTTA TTTTGTAGATGTTG --- CTAATTTTCTCT - GTAAA - CTTAATTA AAT - CTTAAAAA 446
T3063501_pW28      TAATTTTA TTTTGTAGATGTTG --- CTAATTTTCTCT - GTAAA - CTTAATTA AAT - CTTAAAAA 446
LOC_os05g46020_pW07 AAGCGTCT GAGTTAAATTAAG --- TGAGTGCATATTTAATGAA - AATAAA TAAACTATATCTAAAAA 443
H2000561_pW07      AAGCGTCT GAGTTAAATTAAG --- TGAGTGCATATTTAATGAA - AATAAA TAAACTATATCTAAAAA 443
T3066720_pW07      AAGTGTCT GAGTTAAATTAAG --- TAAGTGTATATTTGGTGAA - AATAAACGAACTATATCTAAAAA 443
H2023318_pW64      AACGTA CTACCTGATGATCTA --- TCAAGCTAGCACAAGGA - AGAAACTGAGTCCATGCATATA 304
T3095730_pW64      AACGTA CTACCTGATGATCTA --- TCAAGCTAGCACAAGGA - AGAAACTGAGTCCATGCATATA 173
LOC_os12g02450_pW64 AAATTAGT GTCTAAAGCAGGGA --- CTA AAGTTAAGTCCCTGGATCTAAACACCACCTGAGTCCATATA 452
LOC_os01g40260_pW77 TTAA - TACTTTAT --- GCGTGACTTGCTT - TTTAATTTT TTTTCTAGTT -- 396
T3097007_pW77      TTAA - TACTTTAT --- GCGTGACTTGCTT - TTTAATTTT TTTTCTAGTT -- 396
H1950043_pW77      TTAA - TACTTTAT --- GCGTGACTTGCTT - TTTAATTTT TTTTCTAGTT -- 395
LOC_os09g25070_pW62 TAAAGTAC TCTCCTCTCTTTT GAAAAAAGGCCAAATCCTGACTACGTATCTAAAGATAATACATGCCATA 451
H1972014_pW62p     TAAAGTAC TCTCCTCTCTTTT GAAAAAAGGCCAAATCCTGACTACGTATCTAAAGATAATACATGCCATA 451
T3091546_pW62      TAAAGTAT TTTCTCCTCTCTTTT AAAAAAAGGCCAAATCCTGACTAAATATATAAACATAATACATGCCATA 451
LOC_os05g39720_pW70 TTTGGTCA CACCATGT --- TATAAAGCAGGTCCTATCTTGATCTTAGAAACACATAAATTAAT -- 436
H334389_pW70      TTTGGTCA CACCATGT --- TATAAAGCAGGTCCTATCTTGATCTTAGAAACACATAAATTAAT -- 436
T3094952_pW70      TTTGGTCA CACCATGT --- TATAAAGCAGGTCCTATCTTGATCTTAGAAACACATAAATTAAT -- 436
LOC_os05g45230_pW58 TCAAAACG GACGCAATT --- GACCACGCATGACACATATAAAACCAACACTACGTGAACAAAA -- 441
H1850565_pW58p     TCAAAACG GACGCAATT --- GACCACGCATGACACATATAAAACCAACACTACGTGAACAAAA -- 441
T3075919_pW58      TCAAAACG GACGCAATT --- GACCACGCATGACACATATAAAACCAACACTACGTGAACAAAA -- 429
LOC_os03g21710_pW79 GCAACGAA AGCAAC -- ATGTGTACACTAAAAGAGACGAAATTTCTATCCAAGTAG - ATGCGGACAAAC 445
H1952278_pW79      GCAACGAA AGCAAC -- ATGTGTACACTAAAAGAGACGAAATTTCTATCCAAGTAG - ATGCGGACAAAC 445
T3070072_pW79      GCAACGAA AGCAAC -- ATGTGTACACTAAAAGAGACGAAATTTCTATCCAAGTAG - ATGCGGACAAAC 445
LOC_os05g49620_pW19 TCTTAAAAA TGGAT - TTATTAGAA TTTTATAGTAAC -- TTTTATATAGAAAGTTTCAAAACACCCGT 436
H2014700_pW19      TCTTAAAAA TGGAT - TTATTAGAA TTTTATAGTAAC -- TTTTATATAGAAAGTTTCAAAACACCCGT 435
T3058779_pW19      GTTTCATAT GAAAGTTGCTTAAAAAATCAAATAA TCTATTTTTTTTAAAAAATTT -- AGCTAATAC 439
LOC_os09g25060_pW76 TACTTGAC TATATTTATCAAACCTGCTTAACACTGCGGTCTTCAATTTATAAGTAATTAAGTACGGCCCT 439
T3076120_pW76      TACTTGAC TATATTTATCAAACCTGCTTAACACTGCGGTCTTCAATTTATAAGTAATTAAGTACGGCCCT 436
H1974322_pW76p     TACTTGAC TATATTTATCAAACCTGCTTAACACTGCGGTCTTCAATTTATAAGTAATTAAGTACGGCCCT 439

```

```

      500      510      520      530      540      550      560
LOC_os01g51690_pW26 TAAAC - CTAGTTAAAT - T - TGAAGTAGTTTGACTTTTGACCAAAGTCAAAACATCTTATAACCTGA 518
H289702_pW26      TAAAC - CTAGTTAAAT - T - TGAAGTAGTTTGACTTTTGACCAAAGTCAAAACATCTTATAACCTGA 85
T3056296_pW26      TTTTCAGCCA ATTAGATGGTT - TAAAGGAATCAAGCAATTTAAAAATTCGAA - TTTTCGACCCGCTGA 525
LOC_os01g53260_pW23 TTACGTACCAGTAGAGTACGTACGTATACGTACTGTAACTTTTACAGACAGGAA - CACCTTTTGACTTCG 537
H1961965_pW23      TTACGTACCAGTAGAGTACGTACGTATACGTACTGTAACTTTTACAGACAGGAA - CACCTTTTGACTTCG 537
T3027906_pW23      TTACGTACCAGTAGAGTACGTACGTATACGTACTGTAACTTTTACAGACAGGAA - CACCTTTTGACTTCG 537
LOC_os06g44010_pW28 TAATG - GCAAA TAAATGACTTGTAAATAGAAACGGGAGAGTATCTTTTTTAA - GCFAAGGATCGAG 418
H1976995_pW28      TAATG - GCAAA TAAATGACTTGTAAATAGAAACGGGAGAGTATCTTTTTTAA - GCFAAGGATCGAG 511
T3063501_pW28      TAATG - GCAAA TAAATGACTTGTAAATAGAAACGGGAGAGTATCTTTTTTAA - GCFAAGGATCGAG 510
LOC_os05g46020_pW07 AATTTT - CTTAACCGGTTCTTGACTATCCTATCTCCTAGCTTCCACCCCTCCCAAAAATTTCTTGGTTTGA 511
H2000561_pW07      AATTTT - CTTAACCGGTTCTTGACTATCCTATCTCCTAGCTTCCACCCCTCCCAAAAATTTCTTGGTTTGA 511
T3066720_pW07      AATTTT - CTTAACCGGTTCTTGACTATCCTATCTCCTAGCTTCCACCCCTCCCAAAAATTTCTTGGTTTGA 511
H2023318_pW64      FATGAGCTCCATT CAGCATGC --- GTGTGGTATAGGAGTTAAATTTAGT --- TTTTATCGGT CAC 363
T3095730_pW64      FATGAGCTCCATT CAGCATGC --- GTGTGGTATAGGAGTTAAATTTAGT --- TTTTATCGGT CAC 232
LOC_os12g02450_pW64 FATGAGCTCCATT CAGCATGC --- GTGTGGTAA - GGAGTTAAATTTAGT --- TTTTATCGGT CAC 509
LOC_os01g40260_pW77 -TTTATAA - AAGAGTTTGTCTTTTTTTTTTTGGGACGGAGGGAGTAT - AAGCAACTAGGGAACCTTCCGT 463
T3097007_pW77      -TTTATAA - AAGAGTTTGTCTTTTTTTTTTTGG - ACGGAGGGAGTAT - AAGCAACTAGGGAACCTTCCGT 462
H1950043_pW77      -TTTATAA - AAGAGTTTGTCTTTTTTTTTTTGGGACGGAGGGAGTAT - AAGCAACTAGGGAACCTTCCGT 462
LOC_os09g25070_pW62 ATATATAGCAAGGATTTGCTTTTTTTTGACCGGAGTTAGTAAAGTCTCGAGAGAAGGAAGAAACCT - CCAA 520
H1972014_pW62p     ATATATAGCAAGGATTTGCTTTTTTTTGACCGGAGTTAGTAAAGTCTCGAGAGAAGGAAGAAACCT - CCAA 520
T3091546_pW62      ATATATAGCAAGGATTTGCTTTTTTTTGACCGGAGTTAGTAAAGTCTCGAGAGAAGGAAGAAACCT - CCAA 520
LOC_os05g39720_pW70 GTATGCAATGTCCATT --- GGFAAA TAACTCAGAGTATATTTCTCCTAAAAATTACTCTATGT - TGTG 499
H334389_pW70      GTATGCAATGTCCATT --- GGFAAA TAACTCAGAGTATATTTCTCCTAAAAATTACTCTATGT - TGTG 499
T3094952_pW70      GTATGTAATGTCCGTT --- GGFAAA TAACTCAGAGTATATTTCTCCTAAAAATTACTCTATGT - TGTG 499
LOC_os05g45230_pW58 CTATACTACAACGATTCAGACGGTTTGTATATCTCTCCCTCGTTCCGGCAACAAACCTGCCTGAAC - CCTA 510
H1850565_pW58p     CTATACTACAACGATTCAGACGGTTTGTATATCTCTCCCTCGTTCCGGCAACAAACCTGCCTGAAC - CCTA 510
T3075919_pW58      CTATACTACAACGATTCAGACGGTTTGTATATCTCTCCCTCGTTCCGGCAACAAACCTGCCTGAAC - CCTA 498
LOC_os03g21710_pW79 CTGATTGAAAAC TGCAAGTCTCAGAGCAGTAATCTAACGGTCCCGTGTGTGCCAAGTAAGCGAGTACT 515
H1952278_pW79      CTGATTGAAAAC TGCAAGTCTCAGAGCAGTAATCTAACGGTCCCGTGTGTGCCAAGTAAGCGAGTACT 515
T3070072_pW79      CTGATTGAAAAC TGCAAGTCTCAGAGCAGTAATCTAACGGTCCCGTGTGTGCCAAGTAAGCGAGTACT 515
LOC_os05g49620_pW19 TTAGTTTGA AAAACGTCTAACGGAAACCAGAAAAAATGTATCTTAAATTAATTTAGAACGGGCCATT 506
H2014700_pW19      TTAGTTTGA AAAACGTCTAACGGAAACCAGAAAAAATGTATCTTAAATTAATTTAGAACGGGCCATT 505
T3058779_pW19      TTAATT - AATCATGTGCTAATGGAACGCTCCG --- TTTTYCGTCCGGAGGCATGTGTCCCATC 500
LOC_os09g25060_pW76 GGTAATTC TACAATCTCACCTAGCCAATCTCTCC - ACACACCCCTGAGGCCTTGACGTAGACCCCTG 506
T3076120_pW76      GGTAATTC TACAATCTCACCTAGCCAATCTCTCC - ACACACCCCTGAGGCCTTGACGTAGACCCCTG 506
H1974322_pW76p     GGTAATTC TACAATCTCACCTAGCCAATCTCTCC - ACACACCCCTGAGGCCTTGACGTAGACCCCTG 506

```



```

570      580      590      600      610      620      630
LOC_os01g51690_pW26 AACAGAGAG---TACTTGTAAAGCCATATACAGAGAGTAC TTG TTAAGCTA---GACATGCATA 576
H289702_pW26 AACAGAGAG---TACTTGTAAAGCCATATACAGAGAGTAC TTG TTAAGCTA---GACATGCATA 143
T3056296_pW26 AATGGTGAGAATCTTACCCCTTAAAGCCTTAAATACT-ACATAT TTG CTAAGCTATATAGACATGCATA 591
LOC_os01g53260_pW23 TCTCCAAAC---CTATCTGAAACGGTCGAGGCGATAGCTCTCTTA TTAATCCAC---GAGTAGTATA 598
H1961965_pW23 TCTCCAAAC---CTATCTGAAACGGTCGAGGCGATAGCTCTCTTA TTAATCCAC---GAGTAGTATA 598
T3027906_pW23 TCTCCAAAC---CTATCTGAAACGGTCGAGGCGATAGCTCTCTTA TTAGTCCAC---GAGTAGTATA 598
LOC_os06g44010_pW28 AGCAGAGTGAAAGTAAAAATAAGGCCGGAGTAATAATTAC-CAG-CTGGTTCATCCCAAAAGGTA-- 483
H1976995_pW28 AGCAGAGTGAAAGTAAAAATAAGGCCGGAGTAATAATTAC-CAG-CTGGTTCATCCCAAAAGGTA-- 576
T3063501_pW28 AGCAGAGTGAAAGTAAAAATAAGGCCGGAGTAATAATTAC-CAG-CTGGTTCATCCCAAAAGGTA-- 575
LOC_os05g46020_pW07 CCACACCAACCAACTCGCAGGGAAACCAAAACAAAGAAAGCGGCTTGAACCGGATGGACCGTGGGTGTGTG 581
H2000561_pW07 CCACACCAACCAACTCGCAGGGAAACCAAAACAAAGAAAGCGGCTTGAACCGGATGGACCGTGGGTGTGTG 581
T3066720_pW07 CCACACCAACCAACTCGCAGGGAAACCAAAACAAAGAAAGCGGCTTGAACCGGATGGACCGTGGGTGTGTG 581
H2023318_pW64 ACTGAAAGATGCAATGAAGGTTCTTCTCTCTTATATATGATATAATAA TTAATCTAGCTAGAGAGAGA-- 430
T3095730_pW64 ACTGCAAGATGCATGAAGGTTCTTCTCTCTTATATATGATATAATAA TTAATCTAGCTAGAGAGAGA-- 299
LOC_os12g02450_pW64 ACTGCAAGATGCATGAAGGTTCTTCTCTCTTATATATGATATAATAA TTAATCTAGCTAGAGAGAGA-- 576
LOC_os01g40260_pW77 TGAGTTTAAAAATCCATTCTCCTAAGCTAGCATGGATCGATGAGGACCCACAGCTTTTTTAAAAAATATC 533
T3097007_pW77 TGAGTTTAAAAATCCATTCTCCTAAGCTAGCATGGATCGATGAGGACCCACAGCTTTTTTAAAAAATATC 532
H1950043_pW77 TGAGTTTAAAAATCCATTCTCCTAAGCTAGCATGGATCGATGAGGACCCACAGCTTTTTTAAAAAATATC 532
LOC_os09g25070_pW62 AGGTTTTCCGATTAGCTATAC-AAGGTGGTG-AGCTAGATGA---CCTAAA---TTTAAAGCCTCATC 580
H1972014_pW62p AGGTTTTCCGATTAGCTATAC-AAGGTGGTG-AGCTAGATGA---CCTAAA---TTTAAAGCCTCATC 580
T3091546_pW62 AGGTTTTCCGATTAGCTATAC-AAGGTGGTG-AGCCAGATGA---CCTAAA---TTTAAAGTCTCATC 580
LOC_os05g39720_pW70 TTTTGTAGTTAAA---CCCACGAAGTCTAGATGTACCGCAACAGAAATTTGCATTTAATTAATCAAATGAA 566
H334389_pW70 TTTTGTAGTTAAA---CCCACGAAGTCTAGATGTACCGCAACAGAAATTTGCATTTAATTAATCAAATGAA 566
T3094952_pW70 TTTTGTAGTTAAA---CCCACGAAGTCTAGATGTACCGCAACAGAAATTTGCATTTAATTAATCAAATGAA 566
LOC_os05g45230_pW58 CACGTTAATTACAAATACACCAGATTTAGTTTAAACCAGTGCCTGCCGTGCCGTGCATGTGGACACGTA 580
H1850565_pW58p CACGTTAATTACAAATACACCAGATTTAGTTTAAACCAGTGCCTGCCGTGCCGTGCATGTGGACACGTA 580
T3075919_pW58 CACGTTAATTACAAATACACCAGATTTAGTTTAAACCAGTGCCTGCCGTGCCGTGCATGTGGACACGTA 568
LOC_os03g21710_pW79 ACTCCGATCGTTTTCATCCGGATCGTAGATGTGTAGTGGAGGAAGCTGCCTAGGCCATCCCGATGACCGT 585
H1952278_pW79 ACTCCGATCGTTTTCATCCGGATCGTAGATGTGTAGTGGAGGAAGCTGCCTAGGCCATCCCGATGACCGT 585
T3070072_pW79 ACTCCGATCGTTTTCATCCGGATCGTAGATGTGTAGTGGAGGAAGCTGCCTAGGCCATCCCGATGACCGT 585
LOC_os05g49620_pW19 ATTAGATTAGATATA-ATACTAAGACGAATTTGGACAAGGGATCAGTACAGCGTCCAACACACATAGTTG 575
H2014700_pW19 ATTAGATTAGATATA-ATACTAAGACGAATTTGGACAAGGGATCAGTACAGCGTCCAACACACATAGTTG 574
T3058779_pW19 ATCCACATCGGAACACAGCCTAAGACGAATTTGGACAAGGGATCAGTACAGCGTCCAACACACATAGTTG 570
LOC_os09g25060_pW76 AATCAACCCCAAGTGAAAAACTATCAACAGTCCATTAGCTGAACTGAACTGAAACTGCTAACCAGTAAT 576
T3076120_pW76 AATCAACCCCAAGTGAAAAACTATCAACAGTCCATTAGCTGAACTGAACTGAAACTGCTAACCAGTAAT 576
H1974322_pW76p AATCAACCCCAAGTGAAAAACTATCAACAGTCCATTAGCTGAACTGAACTGAAACTGCTAACCAGTAAT 576

```

```

640      650      660      670      680      690      700
LOC_os01g51690_pW26 AA-TTCAGGAACAGTGGGAACACTAGGATTTACTGCAACTTTCGTTGCCAC-TGGCCCCGGATCCCA 644
H289702_pW26 AA-TTCAGGAACAGTGGGAACACTAGGATTTACTGCAACTTTCGTTGCCAC-TGGCCCCGGATCCCA 211
T3056296_pW26 AA-TTCAGGAACAGTGGGAACACTAGGATTTACTGCAACTTTCGTTGCCAC-TGACCCAGATCCCA 659
LOC_os01g53260_pW23 TA-TATTAATCATGGAGACATCAGACAAGGCTAATTAACAGAGAGGGGCAATATGCAACAACTGATCCCA 667
H1961965_pW23 TA-TATTAATCATGGAGACATCAGACAAGGCTAATTAACAGAGAGGGGCAATATGCAACAACTGATCCCA 667
T3027906_pW23 TA-TATTAATCATGGAGACATCAGACAAGGCTAATTAACAGAGAGGGGCAATATGCAACAACTGATCCCA 667
LOC_os06g44010_pW28 ---GTAGTGAAGGAGTCAACAAATGAATCCAAATTAGCTAGCCTAAATTCCTTT---CAAGGAGGGCCA 545
H1976995_pW28 ---GTAGTGAAGGAGTCAACAAATGAATCCAAATTAGCTAGCCTAAATTCCTTT---CAAGGAGGGCCA 638
T3063501_pW28 ---GTAGTGAAGGAGTCAACAAATGAATCCAAATTAGCTAGCCTAAATTCCTTT---CAAGGAGGGCCA 637
LOC_os05g46020_pW07 AG-AAGGCCCCACGGCAACTACCTGGCGAAGAGGCGAAGACCCGACCCCGTCGAAGTCTTTCCCCCGG 649
H2000561_pW07 AG-AAGGCCCCACGGCAACTACCTGGCGAAGAGGCGAAGACCCGACCCCGTCGAAGTCTTTCCCCCGG 649
T3066720_pW07 AG-AAGGCCCCACGGCAACTACCTGGCGAAGAGGCGAAGACCCGACCCCGTCGAAGTCTTTCCCCCGG 649
H2023318_pW64 GA-GAGAGAGCTAGTGGTTGCAACTTG---CAAATTAGCTAAGTCCAACCTTATTTACTGATAGTCCAAAT 497
T3095730_pW64 GA-GAGAG-CTAGTGGTTGCAACTTG---CAAATTAGCTAAGTCCAACCTTATTTACTGATAGTCCAAAT 364
LOC_os12g02450_pW64 GA-GAGAGAGCTAGTGGTTGCAACTTG---CAAATTAGCTAAGTCCAACCTTATTTACTGATAGTCCAAAT 643
LOC_os01g40260_pW77 TC-TATGGACCTTATTTTTATGTATAAAATAAAATAAAATAAATGACACCCTTAAATACATAGTAGTAAT 602
T3097007_pW77 TC-TATGGACCTTATTTTTATGTATAAAATAAAATAAAATAAATGACACCCTTAAATACATAGTAGTAAT 601
H1950043_pW77 TC-TATGGACCTTATTTTTATGTATAAAATAAAATAAAATAAATGACACCCTTAAATACATAGTAGTAAT 601
LOC_os09g25070_pW62 TC-TTTTAA--TTATTTG-ATAT-TAGGTATTTCTCTAATATTCGTGTCTTTTTTAAAGTCTTATAATAGA 645
H1972014_pW62p TC-TTTTAA--TTATTTG-ATAT-TAGGTATTTCTCTAATATTCGTGTCTTTTTTAAAGTCTTATAATAGA 645
T3091546_pW62 TC-TTTTAA--TTATTTG-ATAT-TAGGTATTTCTCTAATATTCGTGTCTTTTTTAAAGTCTTATAATAGA 645
LOC_os05g39720_pW70 AC-G-AGAACATTGT--GTTTCTTTTTTTGGTTTTTTGCCGTGTAATAGTATACGGGTATACGGTA---- 627
H334389_pW70 AC-G-AGAACATTGT--GTTTCTTTTTTTGGTTTTTTGCCGTGTAATAGTATACGGGTATACGGTA---- 627
T3094952_pW70 AC-G-AGAACATTGT--GTTTCTTTTTTTGGTTTTTTGCCGTGTAATAGTATACGGGTATACGGTA---- 627
LOC_os05g45230_pW58 AT-GCAAAACGTTAGTA-GTTTTCTGTAACAATCTTTTAAATTCGGGTCCTGTCGCCGTTG-ACG-A---- 640
H1850565_pW58p AT-GCAAAACGTTAGTA-GTTTTCTGTAACAATCTTTTAAATTCGGGTCCTGTCGCCGTTG-ACG-A---- 640
T3075919_pW58 AT-GCAAAACGTTAGTA-GTTTTCTGTAACAATCTTTTAAATTCGGGTCCTGTCGCCGTTG-ACG-A---- 628
LOC_os03g21710_pW79 CCGGTCAAAGGCCGTGAATTTGCTGTGACATCAGATCGCCTGTGTCTATGGCGATGACGACGACGACT--- 652
H1952278_pW79 CCGGTCAAAGGCCGTGAATTTGCTGTGACATCAGATCGCCTGTGTCTATGGCGATGACGACGACGACT--- 652
T3070072_pW79 CCGGTCAAAGGCCGTGAATTTGCTGTGACATCAGATCGCCTGTGTCTATGGCGATGACGACGACGACT--- 652
LOC_os05g49620_pW19 TCAGTTGAGCAATGCGCAGCTGCACAAGTGTGTC--CGTCTGTGGTAGGTTGAGAGTTGAGACCATTG-- 641
H2014700_pW19 TCAGTTGAGCAATGCGCAGCTGCACAAGTGTGTC--CGTCTGTGGTAGGTTGAGAGTTGAGACCATTG-- 640
T3058779_pW19 TCAGTTGAGCAATGCGCAGCTGCACAAGTGTGTC--CGTCTGTGGTAGGTTGAGAGTTGAGACCATTG-- 636
LOC_os09g25060_pW76 AACCTCCTCACACCTCCCAATCTCGTCCACAGCATACACAGCTTACGCATGACGTACGCTTCCGTGACGT 646
T3076120_pW76 AACCTCCTCACACCTCCCAATCTCGTCCACAGCATACACAGCTTACGCATGACGTACGCTTCCGTGACGT 646
H1974322_pW76p AACCTCCTCACACCTCCCAATCTCGTCCACAGCATACACAGCTTACGCATGACGTACGCTTCCGTGACGT 646

```



710 720 730 740 750 760 770  
LOC\_os01g51690\_pW26 TCATCCCAGCCCCACGC -CGCCCCAAAGTCCAAAAACCTTA -CCACACGAGGGCAAATACCAAAGGC 711  
H289702\_pW26 TCATCCCAGCCCCACGC -CGCCCCAAAGTCCAAAAACCTTA -CCACACGAGGGCAAATACCAAAGGC 278  
T3056296\_pW26 TCATCCCAGCCCCACGC -CGCCCCAAAGTCCAAAAACCTTA -CCACACGAGGGCAAATACCAAAGGC 726  
LOC\_os01g53260\_pW23 CAAGCTTCCATCCATGCATGCATGCATGGATCGGCCAAGTTAA -AATTTCTATGACTCGT -TGAGGGAC 734  
H1961965\_pW23 CAAGCTTCCATCCATGCATGCATGCATGGATCGGCCAAGTTAA -AATTTCTATGACTCGT -TGAGGGAC 734  
T3027906\_pW23 CAAGCTTCCATCCATGCATGCATGCATGGATCGGCCAAGTTAA -AATTTCTATGACTCGT -TGAGGGAC 734  
LOC\_os06g44010\_pW28 AATTGTAACCCCTCCTGGTTGTTGGCATGTTGGTGTTCCTTTG -AC -CCTGCTTCAGATGCAACCAGC 612  
H1976995\_pW28 AATTGTAACCCCTCCTGGTTGTTGGCATGTTGGTGTTCCTTTG -AC -CCTGCTTCAGATGCAACCAGC 705  
T3063501\_pW28 AATTGTAACCCCTCCTGGTTGTTGGCATGTTGGTGTTCCTTTG -AC -CCTGCTTCAGATGCAACCAGC 704  
LOC\_os05g46020\_pW07 AGACATTTCCGCCATGC -TGCTAAAATAAGTGGGCACGCCGTG -CG -CGCGTGCCTGCGTTCGAGCGGC 715  
H2000561\_pW07 AGACATTTCCGCCATGC -TGCTAAAATAAGTGGGCACGCCGTG -CG -CGCGTGCCTGCGTTCGAGCGGC 715  
T3066720\_pW07 AGACATTTCCGCCATGC -TGCTAAAATAAGTGGGCACGCCGTG -CG -CGCGTGCCTGCGTTCGAGCGGC 715  
H2023318\_pW64 AAGCATGTGCTACATGCATCATATCAATCCATGAGATCTATTG -ATCTTCCCTTCAAATTCGCTTATGCC 565  
T3095730\_pW64 AAGCATGTGCTACATGCATCATATCAATCCATGAGATCTATTG -ATCTTCCCTTCAAATTCGCTTATGCC 432  
LOC\_os12g02450\_pW64 AAGCATGTGCTACATGCATCATATCAATCCATGAGATCTATTG -ATCTTCCCTTCAAATTCGCTTATGCC 711  
LOC\_os01g40260\_pW77 TGATTTAAATTTCTGGCTCCGCTCTGGACAGGAGCCGGGCCACT -TGACTGCACAGTTCTGGACTTCG- 670  
T3097007\_pW77 TGATTTAAATTTCTGGCTCCGCTCTGGACAGGAGCCGGGCCACT -TGACTGCACAGTTCTGGACTTCG- 669  
H1950043\_pW77 TGATTTAAATTTCTGGCTCCGCTCTGGACAGGAGCCGGGCCACT -TGACTGCACAGTTCTGGACTTCG- 669  
LOC\_os09g25070\_pW62 AGG -TAAAAATTAATTCCTAGAAAGAAAAAGTAGAATTTTGTATCTTACGAGGCCATGAGTCACAT- 712  
H1972014\_pW62p AGG -TAAAAATTAATTCCTAGAAAGAAAAAGTAGAATTTTGTATCTTACGAGGCCATGAGTCACAT- 712  
T3091546\_pW62 AGG -TAAAAATTAATTCCTAGAAAGAAAAAGTAGAATTTTGTATCTTACGAGGCCATGAGTCACAT- 712  
LOC\_os05g39720\_pW70 CGCCCGAAACTAGTCAGACAAACGA -TTCCGCGACCGTCACCTCCGACGCTCCGAACCCCCGC- 688  
H334389\_pW70 CGCCCGAAACTAGTCAGACAAACGA -TTCCGCGACCGTCACCTCCGACGCTCCGAACCCCCGC- 688  
T3094952\_pW70 CGCCCGAAACTAGTCAGACAAACGA -TTCCGCGACCGTCACCTCCGACGCTCCGAACCCCCGC- 688  
LOC\_os05g45230\_pW58 CGCCTTAATCTGCACACGCTTATGGGGAGAGAGAGAGAGAGAGAGAGAGAGAGATCAGTA 710  
H1850565\_pW58p CGCCTTAATCTGCACACGCTTATGGGGAGAGAGAGAGAGAGAGAGAGAGAGAGAGATCAGTA 710  
T3075919\_pW58 CGCCTTAATCTGCACACGCTTATGGGGAGAGAGAGAGAGAGAGAGAGAGAGAGAGATCAGTA 690  
LOC\_os03g21710\_pW79 TAGTTTAG -TATAGTATTAGTACCATATATGTATATATGT -GTAATGTAATCCATGTC -708  
H1952278\_pW79 TAGTTTAG -TATAGTATTAGTACCATATATGTATATATGT -GTAATGTAATCCATGTC -708  
T3070072\_pW79 TAGTTTAG -TATAGTATTAGTACCATATATGTATATATGT -GTAATGTAATCCATGTC -708  
LOC\_os05g49620\_pW19 TATTCCTAA -CAAATGGTCAGTCAGACAAAGTTTTTTTTTTT -CGGAACGGTCAGTCAGACAGACAGAA 708  
H2014700\_pW19 TATTCCTAA -CAAATGGTCAGTCAGACAAAGTTTTTTTTTTT -CGGAACGGTCAGTCAGACAGACAGAA 707  
T3058779\_pW19 TATTCCTAA -CAAATGGTCAGTCAGACAAAGTTTTTTTTTTT -CGGAACGGTCAGTCAGACAGACAGAA 704  
LOC\_os09g25060\_pW76 AAGGCCCTCATGCCCTATACGGGATTCGTCAGCTGCGCTCCGTCAGCTCGTCTTGACCGGGGGGACGAC 716  
T3076120\_pW76 AAGGCCCTCATGCCCTATACGGGATTCGTCAGCTGCGCTCCGTCAGCTCGTCTTGACCGGGGGGACGAC 716  
H1974322\_pW76p AAGGCCCTCATGCCCTATACGGGATTCGTCAGCTGCGCTCCGTCAGCTCGTCTTGACCGGGGGGACGAC 716

780 790 800 810 820 830 840  
LOC\_os01g51690\_pW26 AAATAG -GCAAA -AGGCCA -CGTCC -ACGAGTCCATGTCATGA -CACACCCCAAGTTGCTGTAA 770  
H289702\_pW26 AAATAG -GCAAA -AGGCCA -CGTCC -ACGAGTCCATGTCATGA -CACACCCCAAGTTGCTGTAA 337  
T3056296\_pW26 AAATAG -GCAAA -AGGCCA -CGTCC -ACGAGTCCATGTCATGA -CACACCCCAAGTTGCTGTAA 785  
LOC\_os01g53260\_pW23 GAGACG -ACGGGCAGGTGAGCGACC -TTAGATACAGGGTGGTT -GTGATCTGGTTGTGCTCAT 795  
H1961965\_pW23 GAGACG -ACGGGCAGGTGAGCGACC -TTAGATACAGGGTGGTT -GTGATCTGGTTGTGCTCAT 795  
T3027906\_pW23 GAGACG -ACGGGCAGGTGAGCGACC -TTAGATACAGGGTGGTT -GTGATCTGGTTGTGCTCAT 795  
LOC\_os06g44010\_pW28 CAGCCA -GAAGACTCTTCATCCCTC -TTAATTTGACAGAAATAATCCAGATCTAAFAAAAAA -CAC 675  
H1976995\_pW28 CAGCCA -GAAGACTCTTCATCCCTC -TTAATTTGACAGAAATAATCCAGATCTAAFAAAAAA -CAC 768  
T3063501\_pW28 CAGCCA -GAAGACTCTTCATCCCTC -TTAATTTGACAGAAATAATCCAGATCTAAFAAAAAA -CAC 768  
LOC\_os05g46020\_pW07 GGCGCGCGCGCGCACTCCCGCACCCGCTCCGAACTTCTCCCTCCTCAGCAAGCTCACCGCGAAGCCG 785  
H2000561\_pW07 GGCGCGCGCGCGCACTCCCGCACCCGCTCCGAACTTCTCCCTCCTCAGCAAGCTCACCGCGAAGCCG 785  
T3066720\_pW07 GGCGCGCGCGCGCACTCCCGCACCCGCTCCGAACTTCTCCCTCCTCAGCAAGCTCACCGCGAAGCCG 785  
H2023318\_pW64 GATTAT -ATTAGGATACAAGTTGCTTAGCTGAGGTTAAGTGTAGGGCCATATTGAACAGCACTGTAT 632  
T3095730\_pW64 GATTAT -ATTAGGATACAAGTTGCTTAGCTGAGGTTAAGTGTAGGGCCATATTGAACAGCACTGTAT 499  
LOC\_os12g02450\_pW64 GATTAT -ATTAGGATACAAGTTGCTTAGCTGAGGTTAAGTGTAGGGCCATATTGAACAGCACTGTAT 777  
LOC\_os01g40260\_pW77 GTTTAGCAGAGACTCGC -CGCGCGCG -CGCGGGTGGCCGTCGCGTTGCCGGCGTAGCTGTGCATAT 736  
T3097007\_pW77 GTTTAGCAGAGACTCGC -CGCGCGCG -CGCGGGTGGCCGTCGCGTTGCCGGCGTAGCTGTGCATAT 735  
H1950043\_pW77 GTTTAGCAGAGACTCGC -CGCGCGCG -CGCGGGTGGCCGTCGCGTTGCCGGCGTAGCTGTGCATAT 735  
LOC\_os09g25070\_pW62 GAGTA -AGACGCTCGGTACGTAAGCA -CGGGGGCGTCAGCCGCGTCACTG -CTGATGCCAACTTGTCTG 778  
H1972014\_pW62p GAGTA -AGACGCTCGGTACGTAAGCA -CGGGGGCGTCAGCCGCGTCACTG -CTGATGCCAACTTGTCTG 778  
T3091546\_pW62 GAGTA -AGACGCTCGGTACGTAAGCA -CGGGGGCGTCAGCCGCGTCACTG -CTGATGCCAACTTGTCTG 778  
LOC\_os05g39720\_pW70 GACCAGAAACCGTACCCGCCCTCTCCCG -CACCGGGCCCCACCATAGTCCACGTCACCTGCTCAGCGCTC 757  
H334389\_pW70 GACCAGAAACCGTACCCGCCCTCTCCCG -CACCGGGCCCCACCATAGTCCACGTCACCTGCTCAGCGCTC 757  
T3094952\_pW70 GACCAGAAACCGTACCCGCCCTCTCCCG -CACCGGGCCCCACCATAGTCCACGTCACCTGCTCAGCGCTC 757  
LOC\_os05g45230\_pW58 GATCGGCAGTAGTTGAGGTGGTTGATCG -GTCATGGCTGCTCACTCTTCTC -TCAGCTTGGTGTAC 775  
H1850565\_pW58p GATCGGCAGTAGTTGAGGTGGTTGATCG -GTCATGGCTGCTCACTCTTCTC -TCAGCTTGGTGTAC 775  
T3075919\_pW58 GATCGGCAGTAGTTGAGGTGGTTGATCG -GTCATGGCTGCTCACTCTTCTC -TCAGCTTGGTGTAC 755  
LOC\_os03g21710\_pW79 ---CGGTTTTCTTTGCCCTTGGTTTAT -CAATTCATCTGGATATGTACATCTAGGGCCACAGGGGTCCG 773  
H1952278\_pW79 ---CGGTTTTCTTTGCCCTTGGTTTAT -CAATTCATCTGGATATGTACATCTAGGGCCACAGGGGTCCG 773  
T3070072\_pW79 ---CGGTTTTCTTTGCCCTTGGTTTAT -CAATTCATCTGGATATGTACATCTAGGGCCACAGGGGTCCG 773  
LOC\_os05g49620\_pW19 TAGTGATTAGATTAGAGCTGGATTAGT -CTCTGCACATCTCCATGATGGCCAAAGAAACAAAAGACCGG 776  
H2014700\_pW19 TAGTGATTAGATTAGAGCTGGATTAGT -CTCTGCACATCTCCATGATGGCCAAAGAAACAAAAGACCGG 775  
T3058779\_pW19 TAGTGATTAGATTAGAGCTGGATTAGT -CTCTGCACATCTCCATGATGGCCAAAGAAACAAAAGACCGG 772  
LOC\_os09g25060\_pW76 GCCACGCGCGCGTGGCGCTCCGTTGATGGCGGGCGTCGACAGCCAGCTCGCGCGCGCCCCGTTTTTC 786  
T3076120\_pW76 GCCACGCGCGCGTGGCGCTCCGTTGATGGCGGGCGTCGACAGCCAGCTCGCGCGCGCCCCGTTTTTC 786  
H1974322\_pW76p GCCACGCGCGCGTGGCGCTCCGTTGATGGCGGGNNNNNNNNNNNNNNNNNNNNNNNNNNNNNNNNNNNN 786

```

      850      860      870      880      890      900      910
LOC_os01g51690_pW26 GTGG---CAGGGCCGTGCGGGGCATCAAAGCAAAACAAATTCGAAA-CGGGGCGGCTCGCG-CACGGTCG 834
H289702_pW26 GTGG---CAGGGCCGTGCGGGGCATCAAAGCAAAACAAATTCGAAA-CGGGGCGGCTCGCG-CACGGTCG 401
T3056296_pW26 GTGG---CACGGCCGCGCGGGGCATCAAAGCAAAACAAATTCGAAA-CGGGGCGGCTCGCG-CACGGTCG 849
LOC_os01g53260_pW23 CTCT---CGCCCTCTCTCCAATCTCCAATCTCTCT---CTGTCTGATT-TGTAATCTTTTCC--CTTGGCTT 855
H1961965_pW23 CTCT---CGCCCTCTCTCCAATCTCCAATCTCTCT---CTGTCTGATT-TGTAATCTTTTCC--CTTGGCTT 855
T3027906_pW23 CTCT---CGCCCTCTCTCCAATCTCCAATCTCTCT---CTGTCTGATT-TGTAATCTTTTCC--CTTGGCTT 855
LOC_os06g44010_pW28 AGTT---TAATCCTCCTTATTTTCTAAAATGAAAATAGTAGTACT-ACTACTAATTATCATCACAAATG 740
H1976995_pW28 AGTT---TAATCCTCCTTATTTTCTAAAATGAAAATAGTAGTACT-ACTACTAATTATCATCACAAATG 833
T3063501_pW28 AGTT---TAATCCTCCTTATTTTCTAAAATGAAAATAGTAGTACT-ACTACTAATTATCATCACAAATG 833
LOC_os05g46020_pW07 GCAA---AATCCTCCCGGAGAGAGAGACACAACCAACCAACC-AGC--TCCCCCGCGCCCCGCGTG 848
H2000561_pW07 GCAA---AATCCTCCCGGAGAGAGAGACACAACCAACCAACC-AGC--TCCCCCGCGCCCCGCGTG 848
T3066720_pW07 GCAA---AATCCTCCCGGAGAGAGAGACACAACCAACCAACC-AGC--TCCCCCGCGCCCCGCGTG 848
H2023318_pW64 ACAC---CATCATCGCGTGAT---ATATAGCCACATTAAGTA-GGCACCAATCAAATACACATTC 693
T3095730_pW64 ACAC---CATCATCGCGTGAT---ATATAGCCACATTAAGTA-GGCACCAATCAAATACACATTC 560
LOC_os12g02450_pW64 ACACGCCCATCATCTTGCATATC-TCGTTTAAATGTTATATATATAGCCACATTAAGTACACACTTG 846
LOC_os01g40260_pW77 CCGGGATCGAGACGTGCGTGATGT-GTACTGCTGCATGCGGGCATGTTTCTTCCGCGATTTTCCAGG 805
T3097007_pW77 CCGGGATCGAGACGTGCGTGATGT-GTACTGCTGCATGCGGGCATGTTTCTTCCGCGATTTTCCAGG 804
H1950043_pW77 CCGGGATCGAGACGTGCGTGATGT-GTACTGCTGCATGCGGGCATGTTTCTTCCGCGATTTTCCAGG 804
LOC_os09g25070_pW62 TCGTAGTGAGCACAAATCGGTCAAGTCAATGGGGGAGAATGCCAAAATCTCCTTTGTGGGCTTAATTTATA 848
H1972014_pW62p TCGTAGTGAGCACAAATCGGTCAAGTCAATGGGGGAGAATGCCAAAATCTCCTTTGTGGGCTTAATTTATA 848
T3091546_pW62 TCGTAGTGAGCACAAATCGGTCAAGTCAATGGGGGAGAATGCCAAAATCTCCTTTGTGGGCTTAATTTATA 848
LOC_os05g39720_pW70 TCCCA-TTGGTGGGTGCGAATA-GT--CCACAGCAGCATGCGGGGTTCGAGCCCGCCAGTCAAACC---- 819
H334389_pW70 TCCCA-TTGGTGGGTGCGAATA-GT--CCACAGCAGCATGCGGGGTTCGAGCCCGCCAGTCAAACC---- 819
T3094952_pW70 TCCCA-TTGGTGGGTGCGAATA-GT--CCACAGCAGCATGCGGGGTTCGAGCCCGCCAGTCAAACC---- 819
LOC_os05g45230_pW58 ACAGT-TTGAGACGCGGGAGAG-GT--G-AAGGCAGCTTGACGCTTGCCCCACCCACCTTCCCCGC-- 838
H1850565_pW58p ACAGT-TTGAGACGCGGGAGAG-GT--G-AAGGCAGCTTGACGCTTGCCCCACCCACCTTCCCCGC-- 838
T3075919_pW58 ACAGT-TTGAGACGCGGGAGAG-GT--G-AAGGCAGCTTGACGCTTGCCCCACCCACCTTCCCCGC-- 818
LOC_os03g21710_pW79 TCGGGAACCGGGACCCACCTCCGCTCTTCCATCGAGCTTCTCCTATTT-TAGCCTTTTTCCGAGTTCGAC 842
H1952278_pW79 TCGGGAACCGGGACCCACCTCCGCTCTTCCATCGAGCTTCTCCTATTT-TAGCCTTTTTCCGAGTTCGAC 842
T3070072_pW79 TCGGGAACCGGGACCCACCTCCGCTCTTCCATCGAGCTTCTCCTATTT-TAGCCTTTTTCCGAGTTCGAC 842
LOC_os05g49620_pW19 TCCAAGTGTGTTGAATGACACTCGGGTAGTGATATTTCTGTGCTTAGTCAATACTTTTTCCGTCGGTCCGGT 846
H2014700_pW19 TCCAAGTGTGTTGAATGACACTCGGGTAGTGATATTTCTGTGCTTAGTCAATACTTTTTCCGTCGGTCCGGT 845
T3058779_pW19 TCCAAGTGTGTTGAATGACACTCGGGTAGTGATATTTCTGTGCTTAGTCAATACTTTTTCCGTCGGTCCGGT 842
LOC_os09g25060_pW76 CCACCT-CAATTGCGTTACAGTTTTCTCCACAGATCCATGCAAAATTAAGATCACACGGTCTCCTTCCG 855
T3076120_pW76 CCACCT-CAATTGCGTTACAGTTTTCTCCACAGATCCATGCAAAATTAAGATCACACGGTCTCCTTCCG 855
H1974322_pW76p NNNNN-NNNNNNNNNNNNNNNNNNNNCCACAGATCCATGCAAAATTAAGATCACACGGTCTCCTTCCG 855

```

```

      920      930      940      950      960      970      980
LOC_os01g51690_pW26 CGCGCGCCGAAGCTTCATCCAAAGACTCGAGCCAGGAAGCTCGGTGCGAAGCCCA-CCGACGTCGCCCCG 903
H289702_pW26 CGCGCGCCGAAGCTTCATCCAAAGACTCGAGCCAGGAAGCTCGGTGCGAAGCCCA-CCGACGTCGCCCCG 470
T3056296_pW26 CGCGCGCCGAAGCTTCATCCAAAGACTCGAGCCAGGAAGCTCGGTGCGAAGCCCA-CCGACGTCGCCCCG 918
LOC_os01g53260_pW23 TGAGGCTGCACGCTT-GCCCAACTTCCC---CTTGGCTTCTAGCGTCTTATTCCA-CACGCGCACTCCAG 920
H1961965_pW23 TGAGGCTGCACGCTT-GCCCAACTTCCC---CTTGGCTTCTAGCGTCTTATTCCA-CACGCGCACTCCAG 920
T3027906_pW23 TGAGGCTGCACGCTT-GCCCAACTTCCC---CTTGGCTTCTAGCGTCTTATTCCA-CACGCGCACTCCAG 920
LOC_os06g44010_pW28 ACATGATTGATGCTACCTTTAGTCTTTAGACCCTAATTATCCTCCACATGCTGAAATGAAAACCACACTG 810
H1976995_pW28 ACATGATTGATGCTACCTTTAGTCTTTAGACCCTAATTATCCTCCACATGCTGAAATGAAAACCACACTG 903
T3063501_pW28 ACATGATTGATGCTACCTTTAGTCTTTAGACCCTAATTATCCTCCACATGCTGAAATGAAAACCACACTG 903
LOC_os05g46020_pW07 CGATCGATCACGATCGATCTCATCCCTTCGATCGCCTACTACTACCAGTACAAATCCACCCCGCCACA 918
H2000561_pW07 CGATCGATCACGATCGATCTCATCCCTTCGATCGCCTACTACTACCAGTACAAATCCACCCCGCCACA 918
T3066720_pW07 CGATCGATCACGATCGATCTCATCCCTTCGATCGCCTACTACTACCAGTACAAATCCACCCCGCCACA 918
H2023318_pW64 TGACAAACCTGGTTAACCCACACTGCCACAAAGCCAGGTGATCGTCTC--CCTTAATTAGCTTCCACTAA 760
T3095730_pW64 TGACAAACCTGGTTAACCCACACTGCCACAAAGCCAGGTGATCGTCTC--CCTTAATTAGCTTCCACTAA 627
LOC_os12g02450_pW64 TGACAAACCTGATTAACCCACACTGCCACAAAGCCAGGTGATCATCTC--CCTTAATTAGCTTCCACTAA 913
LOC_os01g40260_pW77 CAAAGTCCCCCGCGCACACCC-ACACTGGCACATGTACTACGTC-GCGTTCGGTTTGAACGCGGGCGTG 873
T3097007_pW77 CAAAGTCCCCCGCGCACACCC-ACACTGGCACATGTACTACGTC-GCGTTCGGTTTGAACGCGGGCGTG 872
H1950043_pW77 CAAAGTCCCCCGCGCACACCC-ACACTGGCACATGTACTACGTC-GCGTTCGGTTTGAACGCGGGCGTG 872
LOC_os09g25070_pW62 TGTGGATCACCAATTATCCTCGC-ACAA-AGTTCACGTTTTGGTCC-CCCTCCTGTTCCGGCAGGGCGAC 915
H1972014_pW62p TGTGGATCACCAATTATCCTCGC-ACAA-AGTTCACGTTTTGGTCC-CCCTCCTGTTCCGGCAGGGCGAC 915
T3091546_pW62 TGTGGATCACCAATTATCCTCGC-ACAA-AGTTCACGTTTTGGTCC-CCCTCCTGTTCCGGCAGGGCGAC 915
LOC_os05g39720_pW70 TCGAGGGAGCTTTGACCAGTCA-ACGG---TCAAACGTTCAAAG-GTCTATATAATGATCACCCGGAGGC 883
H334389_pW70 TCGAGGGAGCTTTGACCAGTCA-ACGG---TCAAACGTTCAAAG-GTCTATATAATGATCACCCGGAGGC 883
T3094952_pW70 TCGAGGGAGCTTTGACCAGTCA-ACGG---TCAAACGTTCAAAG-GTCTATATAATGATCACCCGGAGGC 883
LOC_os05g45230_pW58 TCACACCGCCCTTCACTT-ACC-ACCT---CCAGTCGCAGCTAA-CCCT-CGCAGCTGCACCTGCACAC 900
H1850565_pW58p TCACACCGCCCTTCACTT-ACC-ACCT---CCAGTCGCAGCTAA-CCCT-CGCAGCTGCACCTGCACAC 900
T3075919_pW58 TCACACCGCCCTTCACTT-ACC-ACCT---CCAGTCGCAGCTAA-CCCT-CGCAGCTGCACCTGCACAC 880
LOC_os03g21710_pW79 TGCTTTTCCGGCTTTTTTCCCCG-GCGATATATAAGACGCGGATTTGGCACGGGAAATTTTGTCTCATTTGC 911
H1952278_pW79 TGCTTTTCCGGCTTTTTTCCCCG-GCGATATATAAGACGCGGATTTGGCACGGGAAATTTTGTCTCATTTGC 911
T3070072_pW79 TGCTTTTCCGGCTTTTTTCCCCG-GCGATATATAAGACGCGGATTTGGCACGGGAAATTTTGTCTCATTTGC 911
LOC_os05g49620_pW19 CAAAGTTTGGATCTGAAACATGACGCAACGAATCACATTTTGTCT---CCCTATAAAATCTCCTCCTCCG- 912
H2014700_pW19 CAAAGTTTGGATCTGAAACATGACGCAACGAATCACATTTTGTCT---CCCTATAAAATCTCCTCCTCCG- 911
T3058779_pW19 CAAAGTTTGGATCTGAAACATGACGCAACGAATCACATTTTGTCT---CCCTATAAAATCTCCTCCTCCG- 908
LOC_os09g25060_pW76 CCGCCTATATGTAGCGCCACCGATTCC---CCATGAACCATTCAGTGTGTTGACTTGGCTTTGCTGGC 921
T3076120_pW76 CCGCCTATATGTAGCGCCACCGATTCC---CCATGAACCATTCAGTGTGTTGACTTGGCTTTGCTGGC 921
H1974322_pW76p CCGCCTATATGTAGCGCCACCGATTCC---CCATGAACCATTCAGTGTGTTGACTTGGCTTTGCTGGC 921

```



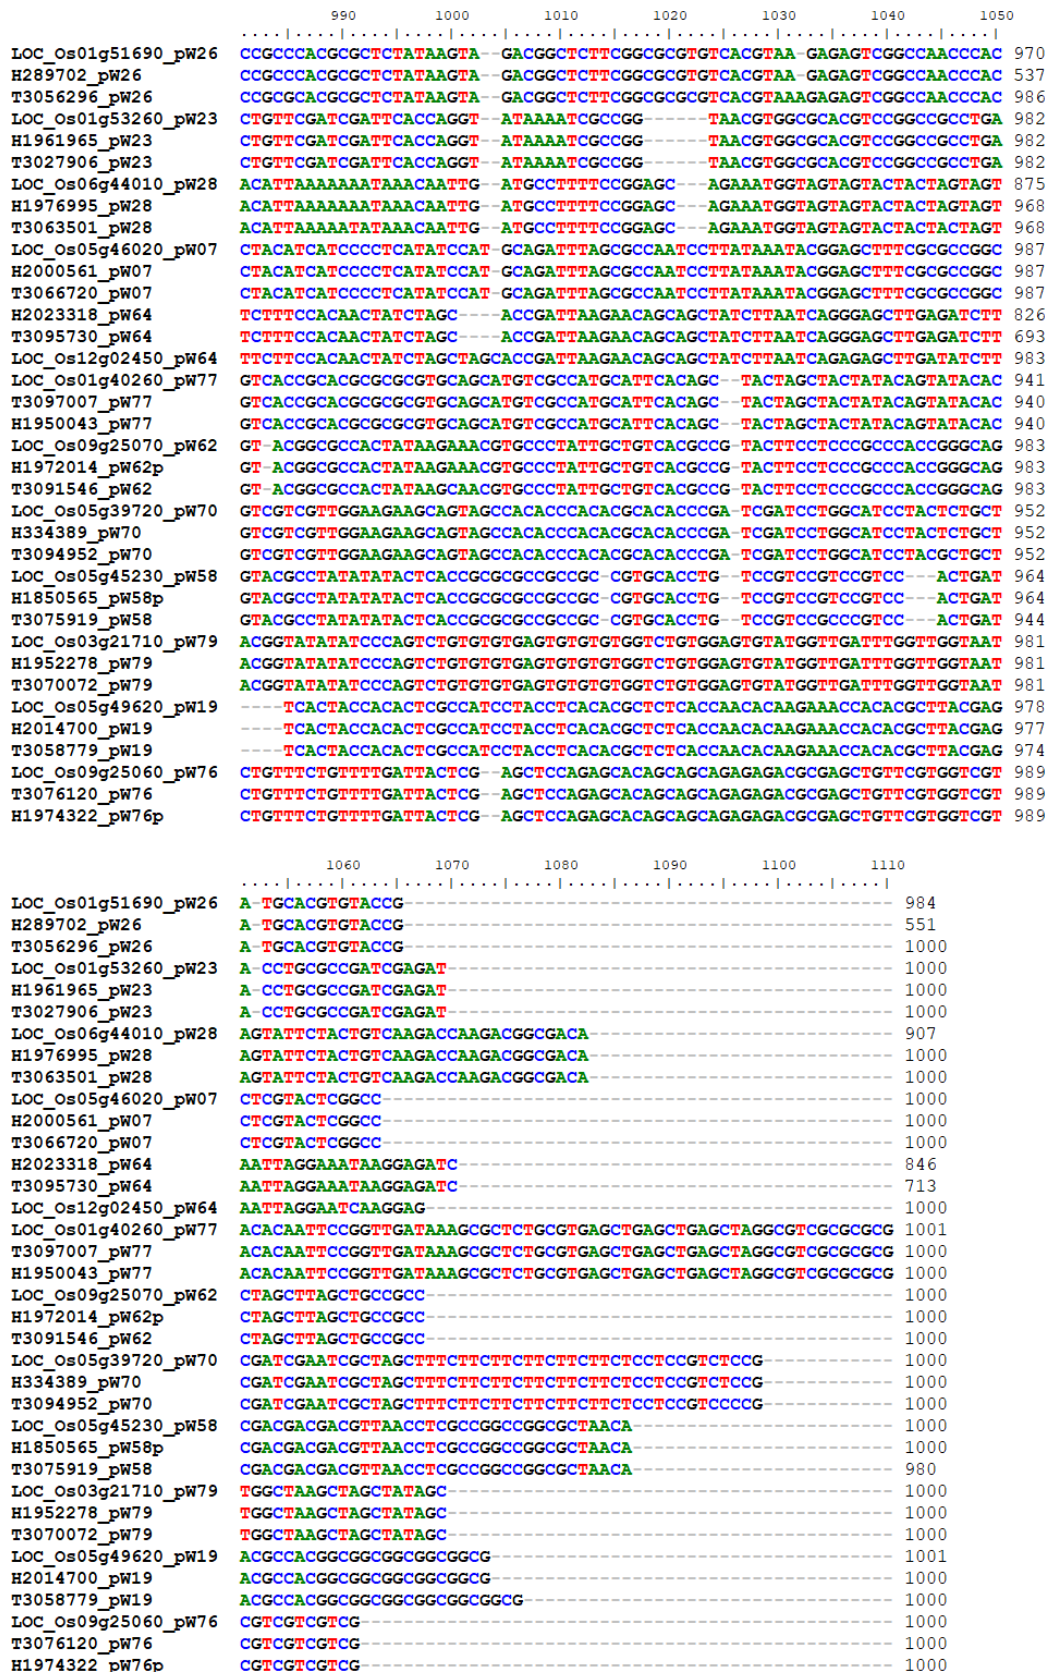

Fig. S4: Structural variation at promoter regions in Tetep and HP2216 in comparison with Nipponbare. The black boxes are showing variations and the brown arrows showing sequence dissimilarity.

**MOTIF LOCATIONS**

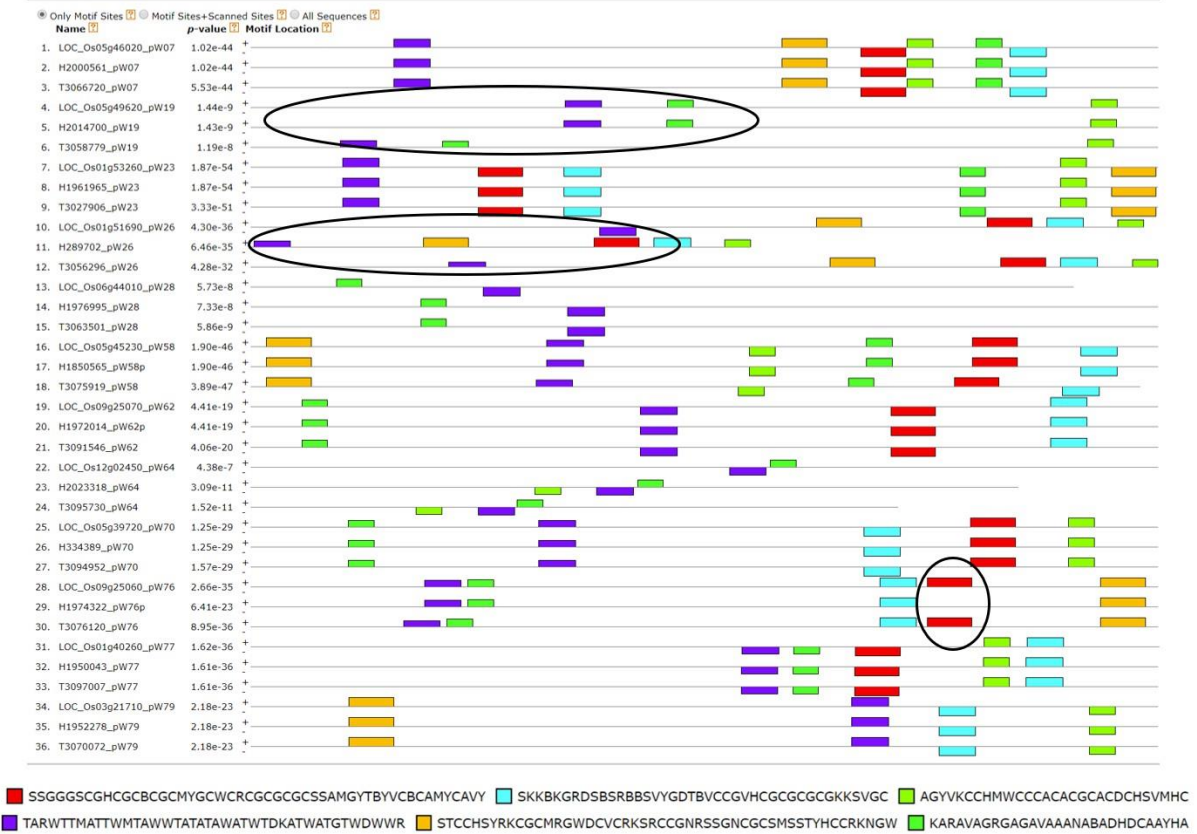

Fig. S5: 1 kb promoter analysis of DEG WRKY for conserved domains search using MEME software. Black circles depict variations in domains.
